1           **The *Streptococcus pneumoniae* Competence-Induced BriC**  
2           **Peptide Promotes Nasopharyngeal Colonization and Impacts**  
3           **Biofilm Development**

4  
5  
6 **Running Title:** Competence-induced peptide regulates biofilms and *in vivo* colonization

7  
8 Surya D. Aggarwal<sup>1</sup>  
9 Rory Eutsey<sup>1</sup>  
10 Jacob West-Roberts<sup>1</sup>  
11 Arnau Domenech<sup>2</sup>  
12 Wenjie Xu<sup>1</sup>  
13 Iman T. Abdullah<sup>3,4</sup>  
14 Aaron P. Mitchell<sup>1</sup>  
15 Jan-Willem Veening<sup>2</sup>  
16 Hasan Yesilkaya<sup>3</sup>  
17 N. Luisa Hiller <sup>\*1,5</sup>

18  
19 <sup>1</sup>Department of Biological Sciences, Carnegie Mellon University, Pittsburgh, PA, USA

20 <sup>2</sup>Department of Fundamental Microbiology, Faculty of Biology and Medicine, University of  
21 Lausanne, Lausanne, Switzerland

22 <sup>3</sup>Department of Infection, Immunity & Inflammation, University of Leicester, Leicester, UK

23 <sup>4</sup>Department of Biology, College of Science, University of Kirkuk, Iraq

24 <sup>5</sup>Center of Excellence in Biofilm Research, Allegheny Health Network, Pittsburgh, PA, USA

25  
26 **\*Correspondence:**

27 N. Luisa Hiller

28 lhiller@andrew.cmu.edu

29  
30 **Keywords:** *Streptococcus pneumoniae*, biofilms, competence, colonization,  
31 transformation, comparative genomics

32  
33  
34

## 35 **Abstract**

36 *Streptococcus pneumoniae* (pneumococcus) is an opportunistic pathogen that causes  
37 otitis media, sinusitis, pneumonia, meningitis and sepsis. The progression to this pathogenic  
38 lifestyle is preceded by asymptomatic colonization of the nasopharynx. This colonization is  
39 associated with biofilm formation; the competence (Com) pathway influences the structure and  
40 stability of biofilms. However, how the Com pathway is linked to biofilm formation is unknown.  
41 Here, we identified a new competence-induced gene, called *briC*, and show that its product  
42 promotes biofilm development and stimulates colonization in a murine model. We show that  
43 expression of *briC* is induced by the master regulator of competence, ComE. Whereas *briC*  
44 does not substantially influence early biofilm development on abiotic surfaces, it significantly  
45 impacts later stages of biofilm development. Specifically, *briC* expression leads to increases in  
46 biofilm biomass and thickness at 72h. Consistent with the role of biofilms in colonization, *briC*  
47 promotes nasopharyngeal colonization in the murine model. The function of BriC appears to be  
48 conserved across pneumococci, as comparative genomics reveal that *briC* is widespread  
49 across isolates. Surprisingly, strains from clinically important PMEN1 and PMEN14 lineages,  
50 which are widely associated with colonization, encode a longer *briC* promoter. This long form  
51 captures an instance of genomic plasticity and functions as a competence-independent  
52 expression enhancer that may serve as a precocious point of entry into this otherwise  
53 competence-regulated pathway. Moreover, overexpression of *briC* by the longer promoter fully  
54 rescues the *comE*-deletion induced biofilm defect *in vitro*, and partially *in vivo*. These findings  
55 indicate that BriC may bypass the influence of competence in biofilm development and that  
56 such a pathway may be active in a subset of pneumococcal lineages. In conclusion, *briC* is a  
57 part of the complex molecular network that connects signaling of the competence pathway to  
58 biofilm development and colonization.

59

## 60 **Introduction**

61 Bacteria form sessile communities termed biofilms, where they interact with each other  
62 to engage in collaborative and/or competitive behaviors (Hall-Stoodley et al., 2004). In  
63 *Streptococcus pneumoniae* (pneumococcus), these cell-cell interactions are commonly  
64 mediated by secreted peptides that interact with both producing and neighboring cells of the  
65 same species, and induce changes in gene regulation that result in altered phenotypes  
66 (Shanker and Federle, 2017). These dynamic pneumococcal biofilms occur in chronic otitis  
67 media, chronic rhinosinusitis and nasopharyngeal colonization (Blanchette-Cain et al., 2013;  
68 Hall-Stoodley et al., 2006; Hoa et al., 2009; Marks et al., 2012a; Oggioni et al., 2006;  
69 Sanderson et al., 2006).

70 The ability to form biofilms is a critical component of pneumococcal disease (Chao et  
71 al., 2015). Biofilms serve as reservoirs for acute infections (Bogaert et al., 2004). In the middle  
72 ear, cells released from a biofilm are thought to be responsible for recurrent episodes of  
73 infection (Hall-Stoodley et al., 2006). Bacterial cells released from nasopharyngeal biofilms can  
74 seed pneumococcal transmission between individuals by being incorporated into nasal  
75 shedding. Alternatively, these cells can disseminate to tissues causing mild to severe  
76 diseases, such as otitis media, pneumonia, and sepsis (Bogaert et al., 2004). Pneumococcal  
77 cells released from biofilms display increased virulence relative to their planktonic or biofilm  
78 counterparts, suggesting that chronic biofilms set the stage for the stimulation of a virulence  
79 program activated upon the dispersal of cells (Marks et al., 2013). Moreover, pneumococci in a  
80 biofilm display decreased susceptibility to antibiotics, and are recalcitrant to treatment (Marks  
81 et al., 2012a). Thus, biofilms are an important component of pneumococcal epidemiology in  
82 transmission, maintenance of asymptomatic colonization, and development of disease.

83 The transcriptional program required for the initiation and the growth of pneumococcal  
84 biofilms has been the subject of numerous investigations. It is clear that at least two quorum

85 sensing (QS) signal transduction pathways are critical for biofilm development: Com and Lux  
86 (Oggioni et al., 2006; Trappetti et al., 2011a, 2011b, Vidal et al., 2011, 2013). The competence  
87 (Com) pathway has been the subject of intense investigation for decades (Alloing et al., 1998;  
88 Guenzi et al., 1994; Havarstein et al., 1995a; Håvarstein et al., 1996; Pestova et al., 1996;  
89 Peterson et al., 2004; Tomasz, 1965). Competence is activated by a classic two-component  
90 system where the extracellular competence stimulating peptide (CSP, encoded by *comC*)  
91 binds to the surface exposed ComD histidine kinase receptor, inducing its autophosphorylation  
92 and the subsequent transfer of the phosphate group to its cognate regulator, ComE  
93 (Havarstein et al., 1995a; Pestova et al., 1996). Activation of the Com pathway leads to  
94 increased expression of 5-10% of the pneumococcal genome in two main waves of gene  
95 expression (Peterson et al., 2004). The first wave of induction is carried out directly by ComE;  
96 it upregulates a subset of competence genes (early genes) that include *comAB*, *comCDE*, as  
97 well as the alternative sigma factor, *comX*. The second wave of competence induction is  
98 regulated by ComX; it leads to an increase in the levels of at least 80 genes (late genes), that  
99 subsequently modulate important phenotypes such as transformation, metabolism, fratricide  
100 and biofilm formation (Claverys et al., 2006; Martin et al., 2010; Peterson et al., 2004). This  
101 competence program is upregulated during biofilm mode of growth *in vitro*, during interactions  
102 with human epithelial cells, and in lungs and brain after intranasal and intracranial challenges  
103 respectively in murine infection models (Aprianto et al., 2016; Oggioni et al., 2006; Trappetti et  
104 al., 2011a). Importantly, in cell culture models, *comC* is required for biofilm development  
105 (Trappetti et al., 2011a; Vidal et al., 2013). Thus, activation of the Com pathway is important  
106 for productive biofilm formation and critical for pneumococcal infection and adaptation.

107 The Lux QS system also plays a role in biofilm formation. In this system, Lux QS is  
108 controlled by the AI-2 autoinducer, which is secreted and sensed by both Gram-positive and  
109 Gram-negative species. LuxS is a node in the regulation of competence, fratricide, and biofilm

110 development (Armbruster et al., 2010; Vidal et al., 2011). Lux upregulates competence via  
111 ComE and ComX (Vidal et al., 2011). It contributes to bactericidal activity via upregulation of  
112 the choline binding murein hydrolase (CbpD). Through lysis, this bacteriocidal activity  
113 increases the levels of extracellular DNA, which is a key ingredient in the extracellular  
114 polymeric substance (EPS) that makes up the biofilm. Thus, the Com and Lux systems provide  
115 the molecular framework to coordinate multi-cellular bacterial communities to form and develop  
116 robust biofilms during infection.

117 Whereas the role of Com signaling in biofilm development is well established, the  
118 molecules that connect competence to biofilms are poorly understood (Blanchette-Cain et al.,  
119 2013; Marks et al., 2012b; Oggioni et al., 2006; Vidal et al., 2011). In this study, we identify one  
120 such molecule that links competence and biofilms. We characterize the gene encoding BriC  
121 (**b**iofilm **r**egulating peptide **i**nduced by **C**ompetence), a novel colonization factor in the  
122 competence pathway. Levels of *briC* are regulated by ComE, and increased *briC* levels  
123 enhance transformation and biofilm development and promote nasopharyngeal colonization.

124

## 125 **Results**

### 126 **Identification of a competence-regulated Gly-Gly peptide**

127 We have identified the gene encoding a putative secreted peptide that is co-regulated  
128 with competence (*spd\_0391* (D39); *spr\_0388* (R6); *sp\_0429* (TIGR4)). Based on the results  
129 presented in this manuscript, we have termed it **b**iofilm-**r**egulating peptide **i**nduced by  
130 **C**ompetence (BriC). BriC was identified in our previously described *in silico* screen designed to  
131 capture cell-cell communication peptides in the pneumococcal genome (Cuevas et al., 2017).  
132 The known double glycine (Gly-Gly) streptococcal peptides are exported and proteolytically  
133 processed by dedicated ABC transporters that recognize N-terminal sequences with the Gly-  
134 Gly leader peptide (LSXXELXXIXGG) (Havarstein et al., 1995b). To identify novel secreted

135 pneumococcal peptides, we performed a computational analysis to search for proteins with N-  
136 termini that contain a Gly-Gly leader. To define this leader, we employed multiple iterations of  
137 Multiple Expectation Maximization for Motif Elicitation (MEME) on an input set that consisted of  
138 the alleles of two exported Gly-Gly peptides, the signaling molecule CSP and the bacteriocin  
139 BIP (Dawid et al., 2007; Havarstein et al., 1995a). This output consists of a position dependent  
140 probability matrix that captures the length and positional variability at each residue of the Gly-  
141 Gly motif. Next, we searched for this motif in a database of sixty streptococcal genomes, using  
142 the Motif Alignment and Search Tool (MAST). As described in our previous work, we defined a  
143 predicted secretome consisting of twenty-five sequence clusters, one of which corresponds to  
144 BriC.

145 To identify genes co-regulated with *briC*, we performed transcriptional studies using a  
146 NanoString probe set that reports on the abundance of the *briC* transcript as well as transcripts  
147 encoding a subset of pneumococcal regulators and cell wall proteins. We assessed the levels  
148 of *briC* transcript *in vitro* and *in vivo*. *In vitro* expression was measured by screening RNA  
149 extracted from mid-log planktonic cultures of a laboratory strain (R6-derivative (R6D)). *In vivo*  
150 expression was evaluated by analysis of middle-ear effusions recovered from chinchillas  
151 infected with a clinical PMEN1 strain. The mRNA levels of the *briC* were positively associated  
152 with *comC* and *comE* *in vitro* (strain R6D:  $R^2=0.61$  and  $0.79$ , respectively) *and in vivo* (strain  
153 PN4595-T23:  $R^2=0.92$  and  $0.88$ , respectively). It is noteworthy that when performing the first  
154 comprehensive cataloguing of CSP-regulated genes, Peterson and colleagues also observed  
155 changes in *briC* levels, however the association between *briC* and CSP was below the  
156 statistical threshold (Peterson et al., 2004). Thus, our gene expression analysis suggests that  
157 *briC* is induced by competence.

158 To directly test whether *briC* is a competence-regulated peptide, we employed fusion of  
159 the *briC* promoter to the *lacZ* reporter (R6 P*briC-lacZ*). Stimulation of the signal transduction

160 system that initiates competence by addition of CSP led to an induction of the  $\beta$ -galactosidase  
161 activity by over twenty-five-fold (**Fig. 1**). Induction of the *briC* promoter was specific to the CSP  
162 phenotype encoded by strain R6. The  $\beta$ -galactosidase activity was observed upon addition of  
163 CSP1, the CSP phenotype from strain R6, but not upon addition of the non-cognate CSP2  
164 phenotype (**Fig. S1**). Thus, we conclude that *briC* is a competence-responsive gene.

### 165 166 **Levels of *briC* transcripts are directly regulated by ComE**

167 Our *in silico* analysis of the *briC* promoter in strains R6 and R6D revealed the presence  
168 of a ComE-binding site. ComE binds a well-defined sequence consisting of two imperfect direct  
169 repeats of nine nucleotides separated by a gap of twelve or thirteen base pairs (Ween et al.,  
170 1999). Our analysis of the putative *briC* promoter across thirty-five pneumococcal strains  
171 revealed an excellent match to the ComE-binding box (**Fig. 2A**). To further investigate the  
172 association between ComE and *briC*, we tested whether CSP-induction of *briC* requires ComE.  
173 We compared the CSP-induction of *briC* in a wild-type (R6D WT) strain to that of an isogenic  
174 *comE*-deletion mutant (R6D $\Delta$ *comE*), using qRT-PCR analysis. In WT cells, the addition of CSP  
175 triggered a significant increase in levels of *briC* at 10 minutes post-addition, with levels slowly  
176 decreasing by 15 minutes (**Fig. 2B**). This trend follows the temporal pattern observed for the  
177 levels of *comE* that has been associated with genes under direct controls of ComE (Peterson  
178 et al., 2004). In contrast, the transcript levels of *briC* were unaffected by CSP addition in the  
179  $\Delta$ *comE* strain, indicating that the expression of *briC* requires ComE (**Fig. 2B**). These results  
180 strongly suggest that *briC* is directly regulated by ComE.

### 181 182 **BriC plays a key role in biofilm development**

183 To investigate whether expression of *briC* plays a role in biofilm development, we  
184 compared biofilm formation across WT (R6D WT), *briC* deletion mutant (R6D $\Delta$ *briC*), and *briC*



185 complemented ( $R6D\Delta briC::briC$ ) strains grown on an abiotic surface at 24h and 72h post-  
186 seeding. No difference was observed in biofilm biomass and thickness at 24h post-seeding,  
187 suggesting that expression of *briC* does not contribute to early stages of biofilm formation (**Fig.**  
188 **3A, B**). In contrast, at 72h post-seeding,  $\Delta briC$  biofilms displayed significantly reduced  
189 biomass and thickness when compared to WT (**Fig. 3C, D**). Further, biofilms with  $\Delta briC::briC$   
190 cells restored the WT phenotype at this time-point (**Fig. 3C, D**). The indistinguishable biofilm  
191 parameters of WT and  $\Delta briC$  cells at 24h post-seeding suggests that there is no fitness-related  
192 growth difference between the strains and indicates that the biofilm defect is biologically  
193 relevant. These findings suggest that *briC* contributes to late biofilm development.

194

### 195 **BriC is widely distributed across pneumococcal strains**

196 To investigate the prevalence of *briC*, we investigated its distribution across the  
197 pneumococcus and related streptococci. To place the distribution in the context of phylogeny,  
198 we used a published species tree generated from a set of fifty-five genomes (Cuevas et al.,  
199 2017; Kadam et al., 2017) (**Table S1**). The genomes encompass thirty-five pneumococcal  
200 genomes that span twenty-nine multi-locus sequence types as well as eighteen serotypes and  
201 nontypeable strains; eighteen genomes from related streptococcal species that also colonize  
202 the human upper respiratory tract, namely *S. pseudopneumoniae*, *S. mitis*, and *S. oralis*; and  
203 finally, two distantly related *S. infantis* strains as an outgroup. Using tblastn, we identified three  
204 distinct polymorphic groups within this set of genomes, one is dominant across pneumococcus  
205 and two are present in related streptococcal species and one pneumococcal strain (**Fig. 4, Fig.**  
206 **S2 and File S1**).

207 In pneumococcus, *briC* is present in a majority of the strains (thirty-four out of thirty-five)  
208 (**Fig. 4**). The extent of *briC* sequence conservation is high; nonetheless, the pneumococcal  
209 strains display two widespread polymorphisms (**Fig. S2**). The first is at the C-terminus where



210 position -2 encodes either an alanine or a threonine. The second is in the putative N-terminal  
211 secretion sequence where the sequences encode either an asparagine or a glutamic acid. In  
212 other streptococci, *briC* homologs are encoded within a subset of *S. mitis* and *S. oralis* strains  
213 (**Fig. 4**). In addition, a strain from *S. oralis* subspecies *tigurinus* encodes two distinct copies of  
214 *briC*. The phylogenetic distribution of *briC* supports a conserved role across pneumococci and  
215 a subset of related streptococcal species.

216

### 217 **Inter-strain differences in the putative *briC* promoter are associated with diverse** 218 **regulation of *briC* in clinically important lineages**

219 As described above, the *briC* promoter contains a ComE-binding box in all  
220 pneumococcal strains. Remarkably, a subset of strains encode for an extra 104 bp within the  
221 region upstream of *briC* (**Fig. 4, File S2**). The additional nucleotides are located after the  
222 ComE-binding site and before the transcriptional start site. In our curated sequences, the  
223 longer promoter is present in strains from the clinically important PMEN1 and PMEN14  
224 lineages (**Fig. 4, Table S1**). To expand beyond our curated set, we investigated the distribution  
225 of these additional nucleotides in a set of 3,529 genome sequences obtained from two large  
226 pneumococcal studies (Chewapreecha et al., 2014; Croucher et al., 2013). We find that the  
227 longer promoter is present in 100% of the PMEN1 and PMEN14 strains in this expanded set.

228 To investigate how this genomic difference influences *briC* expression, we generated a  
229 LacZ reporter strain. The 263bp upstream of *briC* from the PMEN1 strain, PN4595-T23, were  
230 fused to *lacZ* to produce the *PbriC<sub>long</sub>-lacZ* reporter, and its reporter activity was compared to  
231 that of the *PbriC-lacZ* generated with the fusion of 159bp upstream of *briC* obtained from strain  
232 R6. The function of these additional nucleotides could be strain-dependent (for example, via a  
233 regulator encoded only in a subset of strains). Thus, these reporter constructs were tested in  
234 both the R6 and the PMEN1 backgrounds, in the absence and presence of CSP treatment

235 **(Fig. 5A, B)**. The presence of additional nucleotides dramatically increased the basal levels of  
236 *briC* in the absence of CSP, and this increase was observed in both R6 and PMEN1.

237 Furthermore, both constructs were induced upon the addition of CSP. These findings suggest  
238 that the extra nucleotides serve as an expression enhancer; they increase levels of *briC*  
239 transcripts and this increase is CSP-independent. Thus, in some lineages, *briC* appears to be  
240 under the control of both CSP-dependent and CSP-independent regulation.

241

### 242 **Expression of *briC* driven by the longer promoter bypasses the impact of competence** 243 **induction in biofilm development**

244 Next, we investigated the biological impact of the natural variations in the *briC* promoter  
245 on biofilm development. It has been well established that competence promotes biofilm  
246 development. Specifically, deletion of the *comC* (encodes CSP) and *comD* (encodes histidine  
247 kinase of competence TCS) genes lead to a reduction in *in vitro* biofilms in strains D39 and  
248 TIGR4 (Oggioni et al., 2006; Trappetti et al., 2011a). We have shown that the longer promoter  
249 of *briC* serves as an expression enhancer, wherein it drives *briC* expression in a competence-  
250 independent way (**Fig. 5**). Thus, we measured biofilm biomass and thickness for R6D WT,  
251 R6D $\Delta$ *comE*, and a R6D $\Delta$ *comE* strain where *briC* expression is driven by the longer promoter  
252 (R6D $\Delta$ *comE*::*PbriC*<sub>long</sub>-*briC*). At 72h post-seeding, a time-point where *briC* was found to show  
253 observable differences in biofilm parameters, we found that relative to the WT strain, the  
254 R6D $\Delta$ *comE* displayed approximately 15% and 23% reduction in biofilm biomass and maximum  
255 thickness respectively. These defects were fully rescued by increased expression of *briC* in the  
256 R6D $\Delta$ *comE*::*PbriC*<sub>long</sub>-*briC* strain (**Fig. 6A,B**). Thus, expression of *briC* is sufficient to rescue a  
257 competence-dependent biofilm defect. Further, these data suggest that the natural variations  
258 in the *briC* promoter are physiologically relevant.

259            Since BriC is associated with the competence pathway and is able to rescue the biofilm  
260 defects associated with Com signaling, we investigated whether Com-associated transporters  
261 play a role in exporting BriC. The bacteriocin inducing peptide, which is a Gly-Gly peptide, is  
262 exported into the extracellular milieu via two ABC transporters, ComAB and BlpAB (Kjos et al.,  
263 2016; Wholey et al., 2016). In strains R6 and R6D, BlpAB is not functional due to a frameshift  
264 mutation that leads to an early stop codon (Son et al., 2011). Thus, we hypothesized that as a  
265 Gly-Gly peptide co-expressed with genes of the competence pathway, BriC may be exported  
266 via the ComAB transporter. We tested this hypothesis by investigating whether the role of BriC  
267 in contributing to biofilm development is impaired in a *comAB*-deletion mutant. We compared  
268 the biofilm biomass and thickness of a *comE/comAB*-double deletion mutant overexpressing  
269 *briC* (R6D $\Delta$ *comE* $\Delta$ *comAB*::*PbriC*<sub>long</sub>-*briC*) to that of a *comE*-deletion strain overexpressing *briC*  
270 (R6D $\Delta$ *comE*::*PbriC*<sub>long</sub>-*briC*) and a *comE*-deletion strain (R6D $\Delta$ *comE*) at 72h post-seeding. We  
271 found that the ability of the strain overexpressing *briC* to rescue the defect of a *comE*-deletion  
272 strain was hindered when the *comAB* transporter was also deleted (**Fig. S3**). However, the  
273 biofilm biomass and thickness of  $\Delta$ *comE* $\Delta$ *comAB*::*PbriC*<sub>long</sub>-*briC* were still significantly higher  
274 than that of  $\Delta$ *comE* cells. These findings suggested that ComAB may contribute to the  
275 secretion of BriC. However, our results did not exclude the possibility of other genes being  
276 involved in the export process.

277

### 278 **BriC is important for *in vivo* colonization**

279            During nasopharyngeal colonization, pneumococci form biofilms and upregulate the  
280 competence pathway. Thus, we investigated the role of *briC* in nasopharyngeal colonization  
281 using an experimental murine colonization model. Our *in vitro* investigations have been  
282 performed using strain R6D strain, which is defective in colonization due to the absence of a  
283 capsule. Thus, we performed colonization experiments with the serotype 2 D39 strain, which is

284 the ancestor of strain R6 (Lanie et al., 2007). Mice were colonized with D39 WT, the *briC*-  
285 deletion mutant (D39 $\Delta$ *briC*) or the *briC*-complemented (D39 $\Delta$ *briC*::*briC*) strains. Comparison of  
286 the number of bacteria in nasal lavages immediately after inoculation revealed that mice in the  
287 three cohorts received the same number of bacteria. In contrast, nasal lavages at three and  
288 seven days post-inoculation revealed decreased levels of D39 $\Delta$ *briC* relative to WT in the nasal  
289 wash (**Fig. 7A**). Furthermore, the WT levels were restored in the complemented strain (**Fig.**  
290 **7A**). These findings indicate that *briC* encodes a novel colonization factor.

291 In *in vitro* biofilms, overexpression of *briC* driven by the long version of the promoter  
292 was found to restore the competence-dependent defect in biofilm development. Thus, we  
293 investigated whether expression driven by this *briC* promoter can restore the colonization  
294 defect associated with a *comE* deletion-mutant *in vivo*. We found that additions of this longer  
295 *briC* promoter in  $\Delta$ *comE* cells (D39 $\Delta$ *comE*::*PbriC*<sub>long</sub>-*briC*) partially rescues the colonization  
296 defect of the D39 $\Delta$ *comE* strain. The numbers of bacterial cells of strain D39 $\Delta$ *comE*::*PbriC*<sub>long</sub>-  
297 *briC* recovered from the nasal lavages at both three and seven days post-inoculation were  
298 significantly higher than the numbers of D39 $\Delta$ *comE* cells recovered, but less than that of the  
299 D39 WT (**Fig. 7B**). Thus, we conclude that BriC is a key contributor to the competence-  
300 induced stimulation of nasopharyngeal colonization observed in strain D39. Further, natural  
301 variations leading to a longer *briC* promoter appear to dampen the impact of competence in  
302 colonization.

303

## 304 Discussion

305 An important component of pneumococcal pathogenesis is its ability to form complex  
306 biofilm structures. Pneumococci in a biofilm mode of growth display decreased sensitivity to  
307 antibiotics and increased resistance to host immune responses (Marks et al., 2012a). These

308 properties make the bacteria recalcitrant to treatment and highlight the need to better  
309 understand the molecular mechanisms that drive biofilm development. Activation of the  
310 competence pathway is critical for biofilm development. Previous *in vitro* studies have  
311 demonstrated that while cell-adherence and early biofilm formation is competence-  
312 independent, an intact competence system is required in the later stages of biofilm  
313 development. It was shown that the competence pathway positively influences structure and  
314 stability of late stage biofilms (Trappetti et al., 2011a). However, the molecules downstream of  
315 competence activation by ComDE that regulate biofilm development remain poorly understood.  
316 In this study, we present BriC, a previously uncharacterized peptide, that we show is regulated  
317 by competence and plays a role in promoting biofilm development and nasopharyngeal  
318 colonization.

319 We have presented extensive evidence that *briC* is a competence regulated gene. We  
320 have shown that induction of *briC* is triggered by addition of CSP and requires ComE. Further,  
321 we have also shown that the *briC* promoter encodes the consensus ComE-binding box, and  
322 that *briC* expression follows the temporal pattern described for genes directly regulated by  
323 ComE. Previously, Peterson and colleagues have performed microarray studies to identify  
324 pneumococcal genes differentially regulated upon CSP stimulation (Peterson et al., 2004).  
325 They had categorized these genes into three categories - early genes regulated by ComE, late  
326 genes regulated by the ComX alternative sigma factor, or delayed genes that appeared to be  
327 stress-related. In their study, *briC* was found to be upregulated in a pattern consistent with  
328 early genes. However, the upregulation was not found to be statistically significant, and this  
329 study is the first validation of *briC* as a competence-regulated peptide.

330 We have provided evidence that *briC* stimulates biofilm development on abiotic surfaces  
331 and promotes nasopharyngeal colonization in a murine model. These findings are consistent  
332 with studies that show that pneumococcal biofilms contribute to colonization. Colonization of

333 the upper respiratory tract is a requisite for pneumococcal dissemination to distant anatomical  
334 sites and subsequent disease (Bogaert et al., 2004). These sessile communities serve as a  
335 source of pneumococcal cells with an activated virulence-associated transcription program.  
336 That is, when compared to cells originating from a planktonic mode of growth, those originating  
337 from a biofilm mode of growth are more likely to cause disease upon infecting other tissues  
338 (Marks et al., 2013). In this manner, increased biofilm development likely heightens the risk for  
339 disease. Biofilms and competence are also associated with transformation efficiency. We have  
340 observed a mild but significant decrease in the transformation efficiency of *briC*-deletion  
341 mutants relative to WT R6D cells (**Fig. S4**). Finally, colonization of the upper respiratory tract is  
342 also a reservoir for pneumococcal transmission. Transmission occurs when cells migrate from  
343 the nasopharynx of one host to that of another. Thus, BriC's contribution to colonization may  
344 influence both disease severity and transmission.

345 While it has been established that CSP contributes to biofilm development, the  
346 competence-dependent genes that regulate biofilm development are not well understood  
347 (Oggioni et al., 2006; Trappetti et al., 2011a). Our finding that increased levels of *briC* can fully  
348 rescue biofilm defects from a *comE* deletion mutant *in vitro*, and partially rescue its  
349 colonization defects *in vivo* suggests that *briC* expression may bypass the requirement for  
350 competence in biofilm development. ComE is a key regulator of competence whose activity is  
351 required to regulate approximately 5-10% of the genome, and as such deletion of *comE* is  
352 expected to have substantial global consequences (Peterson et al., 2004). In this context, it is  
353 remarkable that overexpression of one gene (*briC*) in the *comE*-deletion mutant was able to  
354 significantly improve colonization in the murine model. These findings strongly suggested that  
355 BriC is a molecular link between competence, biofilm development, and colonization.

356 Our data suggests that many strains have multiple inputs to the regulation of *briC*.  
357 Shared across all strains is the regulation by ComE, the key regulator of the competence

358 pathway. Competence is responsive to environmental cues, such as changes in cell density,  
359 pH, mutational burden in cells, and exposure to antibiotics (Claverys et al., 2006; Gagne et al.,  
360 2013; Hakenbeck and Chhatwal, 2007; Moreno-Gómez et al., 2017). Conversely, competence  
361 is inhibited by the degradation of CSP via the activity of the CiaHR TCS and the serine  
362 protease, HtrA (Mascher et al., 2003; Sebert et al., 2005). Factors altering competence will  
363 also alter *briC* levels due to its competence-dependent induction. Our comparative genomics  
364 suggest that a subset of pneumococcal lineages may encode an additional *briC*-regulatory  
365 element. Specifically, the *briC* promoter differs across strains, in that a subset of lineages  
366 encodes a promoter that is longer by 104bp (*P<sub>briC<sub>long</sub></sub>*) and has higher basal levels of *briC*  
367 expression. This longer promoter is constitutively active, even when competence is off.

368 The longer promoter is encoded in the vast majority of strains from the PMEN1 lineage  
369 (Spanish-USA) and the PMEN14 (Taiwan-19F) lineages. These lineages are prominent in the  
370 clinical setting; they are multi-drug resistant and pandemic (Croucher et al., 2011, 2014; Wyres  
371 et al., 2012). This additional competence-independent regulation of the longer promoter may  
372 provide promoter-binding sites for additional regulators or reflects consequences of positional  
373 differences for the existing promoter binding sites. Our biofilm and colonization experiments  
374 suggest that encoding the longer *briC* promoter has functional consequences. We conclude  
375 that the response of *briC* to competence is ubiquitous, but that additional lineage-specific  
376 factors influence *briC* regulation and downstream phenotypic consequences.

377 We propose a model where *briC* encodes a signaling molecule with a role in biofilm  
378 development and colonization. First, the transcription of *briC* is induced by ComE through  
379 competence signal transduction pathway in all lineages, and possibly by additional regulator(s)  
380 in a subset of lineages. Once this Gly-Gly peptide is produced, we propose that it is exported  
381 through ABC transporters, a process in which ComAB plays a role. Based on a bioinformatic  
382 comparison with other Gly-Gly peptides we suggest that BriC is cleaved into its active form



383 (BRIC) during export. It is tempting to speculate that BRIC is a new member of the expanding  
384 set of pneumococcal secreted peptides that signal to neighboring cells promoting population-  
385 level behaviors.

386

## 387 **Materials & Methods**

### 388 **Bacterial strains & growth conditions**

389 Three wild-type (WT) *Streptococcus pneumoniae* strains were used for this  
390 experimental work. The majority of studies were performed on a penicillin-resistant derivative  
391 of R6 (R6D); this strain was generated from a cross where parental strain R6 was recombined  
392 with Hungary19A and the recombinant was selected for penicillin resistance (Severin et al.,  
393 1996). The *briC* allele in R6D is identical to the allele present in the parental R6. This  
394 laboratory strain is non-encapsulated and does not colonize mice, thus mice colonization  
395 experiments were performed with the serotype 2 D39 strains (GenBank CP000410)(Paixão et  
396 al., 2015). The D39 strain contains the same *briC* allele as is present in the R6D strain, which  
397 has been used for most of the work in this study. Finally, for a representative of PMEN1, we  
398 used the carriage isolate, PN4595-T23 (GenBank ABXO01) graciously provided by Drs.  
399 Alexander Tomasz and Herminia deLancastre (Hiller et al., 2011).

400 Colonies were grown from frozen stocks by streaking on TSA-II agar plates  
401 supplemented with 5% sheep blood (BD BBL, New Jersey, USA). Colonies were then used to  
402 inoculate fresh Columbia broth (Remel Microbiology Products, Thermo Fisher Scientific, USA)  
403 and incubated at 37°C and 5% CO<sub>2</sub> without shaking. When noted, colonies were inoculated  
404 into acidic Columbia broth prepared by adjusting the pH of Columbia broth to 6.6 using 1M  
405 HCl. Acidic pH was used to inhibit the endogenous activation of competence.

406

### 407 **Construction of mutants**

408 The mutant strains (R6D $\Delta$ *briC* and PN4595 $\Delta$ *briC*) were constructed by using site-  
409 directed homologous recombination to replace the region of interest with erythromycin-  
410 resistance gene (*ermB*) or kanamycin-resistance gene (*kan*), respectively (**Table S2**). *Kan* and  
411 spectinomycin-resistance gene (*aad9*) were used to construct  $\Delta$ *comE* strains in R6D and  
412 PN4595-T23 respectively. Briefly, the transformation construct was generated by assembling  
413 the amplified flanking regions and antibiotic resistance cassettes. ~2kb of flanking regions  
414 upstream and downstream of the gene of interest was amplified from parental strains by PCR  
415 using Q5 2x Master Mix (New England Biolabs, USA). The antibiotic resistance genes, *kan*  
416 and *aad9* were amplified from *kan-rpsL* Janus Cassette and pR412, respectively (provided by  
417 Dr. Donald A. Morrison), and *ermB* was amplified from *S. pneumoniae* SV35-T23. SV35-T23 is  
418 resistant to erythromycin because of the insertion of a mobile element containing *ermB* (Hiller  
419 et al., 2011). These PCR fragments were then assembled together by sticky-end ligation of  
420 restriction enzyme-cut PCR products. The deletion mutant in R6D is an overexpressor of the  
421 downstream peptide (*spr\_0389*).

422 The *briC* complemented and overexpressor strains were generated using constructs  
423 containing the CDS of *briC* along with either its entire native promoter region or overexpressing  
424 promoter respectively, ligated at its 3' end with a kanamycin resistance cassette. The  
425 promoters used to overexpress *briC* included either the constitutive *amiA* promoter, or  
426 *PbriC*<sub>long</sub>. These were assembled with the amplified flanking regions by Gibson Assembly  
427 using NEBuilder HiFi DNA Assembly Cloning Kit. The construct was introduced in the genome  
428 of R6D downstream of the *bga* region (without modifying *bga*), a commonly employed site  
429 (Zähler and Hakenbeck, 2000). Primers used to generate the constructs are listed in **Table**  
430 **S3**. The R6D $\Delta$ *briC*::*briC* is also an overexpressor of the downstream peptide (*spr\_0389*). The  
431 R6D $\Delta$ *comE*::*PbriC*<sub>long</sub>-*briC* strain was constructed by replacing *comE* with spectinomycin  
432 resistant cassette in the R6D *PbriC*<sub>long</sub>-*briC* strain. *comAB*-deletion mutant in a *briC*

433 overexpressor R6D genomic background strain (R6D $\Delta$ *comAB*::*PbriC*<sub>long</sub>-*briC*) was constructed  
434 by transforming the R6D*briC*-OE with the genomic DNA of ADP226. ADP226 is a strain from  
435 the D39 genomic background with *comAB* replaced by erythromycin resistance cassette. To  
436 make the construct, the flanking regions and erythromycin resistance cassette were  
437 amplified, and then assembled together by sticky-end ligation of restriction enzyme-cut PCR  
438 products. The construct was then transformed into D39 ADP225 (unpublished) and selected  
439 on Columbia blood agar supplemented with 0.25  $\mu$ g mL<sup>-1</sup> erythromycin.

440 The D39 *briC* deletion mutant (D39 $\Delta$ *briC*), *briC* complemented (D39 $\Delta$ *briC*::*briC*), *comE*  
441 deletion mutant (D39 $\Delta$ *comE*), and *briC* overexpressor in *comE* deletion background  
442 (D39 $\Delta$ *comE*::*PbriC*<sub>long</sub>-*briC*) strains were generated by transformation with the corresponding  
443 constructs amplified from R6D.

444

#### 445 **Construction of *lacZ* fusions**

446 Chromosomal transcriptional *lacZ*-fusions to the target promoters were generated to  
447 assay promoter activity. These *lacZ*-fusions were generated via double crossover homologous  
448 recombination event in the *bgaA* gene using modified integration plasmid pPP2. pPP2 was  
449 modified by introducing *kan* in the multiple cloning site, in a direction opposite to *lacZ*. The  
450 modified pPP2 was transformed into *E. coli* TOP10. The putative *briC* promoter regions were  
451 amplified from R6 and PN4595-T23 strains, and modified to contain KpnI and XbaI restriction  
452 sites, which were then assembled in the modified pPP2 plasmid by sticky-end ligation of the  
453 enzyme digested products. These plasmids were transformed into *E. coli* TOP10 strain, and  
454 selected on LB (Miller's modification, Alfa Aesar, USA) plates, supplemented with ampicillin  
455 (100 $\mu$ g/ml). These plasmids were then purified by using E.Z.N.A. Plasmid DNA Mini Kit II  
456 (OMEGA bio-tek, USA), and transformed into pneumococcal strains R6 and PN4595-T23 and  
457 selected on Columbia agar plates supplemented with kanamycin (150 $\mu$ g/ml).

458

## 459 **Bacterial transformations**

460 For all bacterial transformations to generate mutants, target strains (R6D or D39) were  
461 grown in acidic Columbia broth, and 1µg of transforming DNA along with 125µg/mL of CSP1  
462 (sequence: EMRLSKFFRDFILQRKK; purchased from GenScript, NJ, USA) was added to them  
463 when the cultures reached an OD<sub>600</sub> of 0.05, followed by incubation at 37°C. After 2 hours, the  
464 treated cultures were plated on Columbia agar plates containing the appropriate antibiotic;  
465 erythromycin (2µg/ml), or kanamycin (150µg/ml). Resistant colonies were cultured in selective  
466 media, and the colonies confirmed using PCR. Bacterial strains generated in this study are  
467 listed in **Table S2**.

468 For transformation efficiency experiments, R6D strain was grown in acidic Columbia  
469 broth until it reached an OD<sub>600</sub> of 0.05. At this point, number of viable cells was counted by  
470 plating serial dilutions on TSA-blood agar plates. Transformations were carried out by adding  
471 either 100ng or 500ng of transforming DNA in the media supplemented with 125µg/mL of  
472 CSP1 and incubated at 37°C for 30mins. For transforming DNA, we used either genomic DNA  
473 or PCR products. The donor DNA contained spectinomycin-resistance gene (*aad9*) in the inert  
474 genomic region between *spr\_0515* and *spr\_0516*. This construct was generated in PN4595-  
475 T23, spec<sup>R</sup>, followed by its amplification and transformation into R6D and Taiwan-19F strains  
476 (Sp3063-00). The genomic DNA was extracted from Taiwan-19F, spec<sup>R</sup> strain. The purified  
477 linear DNA was an amplimer of the region from R6D. After 30 minutes, the cultures were  
478 plated on Columbia agar plates containing spectinomycin (100µg/ml), incubated overnight, and  
479 colonies were counted the next day.

480

## 481 **RNA extraction**

482 RNA extraction consists of sample collection, pneumococcal cell lysis, and purification  
483 of RNA. For qRT-PCR analysis, the strains (R6D and R6D $\Delta$ *comE*) were grown to an OD<sub>600</sub> of  
484 0.3 in acidic Columbia broth, followed by CSP1 treatment for 0, 10, or 15 minutes. For *in vitro*  
485 transcriptomic analysis using NanoString Technology, the R6D strain was grown to an OD<sub>600</sub>  
486 of 0.1 in Columbia broth (in one experimental set, the samples were grown in sub-lethal  
487 concentration of penicillin (0.8 $\mu$ g/ml) for an hour). RNA was collected in RNALater (Thermo  
488 Fisher Scientific, USA) to preserve RNA quality and pelleted. For the *in vivo* experiments, the  
489 RNA was extracted from middle-ear chinchilla effusions infected with PN4595-T23 and  
490 PN4595-T23 $\Delta$ *comE* strains, and preserved by flash freezing the effusion. In all the samples,  
491 the pneumococcal cell lysis was performed by re-suspending the cell pellet in an enzyme  
492 cocktail (2mg/ml proteinase K, 10mg/ml lysozyme, and 20 $\mu$ g/ml mutanolysin), followed by  
493 bead beating with glass beads (0.5mm Zirconia/Silica) in FastPrep-24 Instrument (MP  
494 Biomedicals, USA). Finally, RNA was isolated using the RNeasy kit (Genesee Scientific, USA)  
495 following manufacturer's instructions. For analysis with the NanoString, which does not require  
496 pure DNA, the output from the RNeasy kit was loaded on the machine without further  
497 processing. For analysis using qRT-PCR, contaminant DNA was removed by treating with  
498 DNase (2U/ $\mu$ L) at 37°C for at least 45 mins. The RNA concentration was measured by  
499 NanoDrop 2000c spectrophotometer (Thermo Fisher Scientific, USA) and its integrity was  
500 confirmed on gel electrophoresis. The purity of the RNA samples was confirmed by the  
501 absence of a DNA band on an agarose gel obtained upon running the PCR products for the  
502 samples amplified for *gapdh*.

503

#### 504 **NanoString Technology for transcriptional analysis**

505 nCounter Analysis System from NanoString Technology provides a highly sensitive  
506 platform to measure gene expression both *in vitro* and *in vivo*, as previously described (Geiss

507 et al., 2008). Probes used in this study were custom-designed by NanoString Technology, and  
508 included housekeeping genes *gyrB* and *metG*, which were used as normalization controls. 5 $\mu$ L  
509 of extracted RNA samples were hybridized onto the nCounter chip following manufacturer's  
510 instructions. RNA concentration ranged from 80-200ng/ $\mu$ L for *in vivo* samples, and between  
511 60-70ng total RNA for *in vitro* samples. A freely available software from manufacturers,  
512 nSolver, was used for quality assessment of the data, and normalization. The RNA counts  
513 were normalized against the geometric mean of *gyrB* and *metG* (Carvalho et al., 2011; Kim et  
514 al., 2013). Pearson's Correlation Coefficient was used to estimate correlation in the expression  
515 levels of different genes.

516

### 517 **qRT-PCR for transcriptional analysis**

518 High quality RNA was used as a template for first-strand cDNA synthesis SuperScript  
519 VILO synthesis kit (Invitrogen). The resulting product was then directly used for qRT-PCR  
520 using PerfeCTa SYBR Green SuperMix (Quantabio, USA) in an Applied Biosystems 7300  
521 Instrument (Applied Biosystems, USA). 16S rRNA counts were used for normalization. The raw  
522 data was then run through LinregPCR for expression data analysis, where the output  
523 expression data is displayed in arbitrary fluorescence units ( $N_0$ ) that represent the starting  
524 RNA amount for the test gene in that sample (Ramakers et al., 2003; Ruijter et al., 2014). Fold-  
525 change relative to WT was then calculated for each individual experiment.

### 526 **$\beta$ -galactosidase assay**

527  $\beta$ -galactosidase assays were performed as previously described (Miller, JH, 1972) using  
528 cells that were grown in acidic Columbia broth to exponential phase. Cells were either left  
529 untreated, or independently treated with CSP1 (EMRLSKFFRDFILQRKK), CSP2  
530 (EMRISRIILDFLFLRKK) or PhrA (LDVGKAD) (Kadam et al., 2017) (Genscript, USA) for 30  
531 minutes and processed for analysis.

532

### 533 **Biofilm formation assay**

534 Pneumococcal cultures grown in Columbia broth were used to seed biofilms on abiotic  
535 surfaces. When the cultures reached an OD<sub>600</sub> of 0.05, each bacterial strain was seeded on  
536 35MM glass bottom culture dishes (MatTek Corporation, USA). To promote biofilm growth, the  
537 plates were incubated at 37°C and 5% CO<sub>2</sub>. Every 24 hours, the supernatant was carefully  
538 aspirated, followed by addition of the same volume of pre-warmed Columbia broth at one-fifth  
539 concentration. The biofilm samples were fixed at two time-points: 24 and 72 hrs. For fixing, the  
540 supernatants were carefully aspirated, and biofilms were washed thrice with PBS to remove  
541 non-adherent and/or weakly adherent bacteria. Subsequently, biofilms were fixed with 4% PFA  
542 (Electron Microscopy Sciences), washed three times with PBS, and prepared for confocal  
543 microscopy.

544

### 545 **Confocal microscopy & quantification of biofilms**

546 Fixed biofilms were stained with SYTO59 Nucleic Acid Stain (Life Technologies, USA)  
547 for 30 minutes, washed three times, and preserved in PBS buffer for imaging. Confocal  
548 microscopy was performed on the stage of Carl Zeiss LSM-880 META FCS, using 561nm  
549 laser line for SYTO59 dye. Stack were captured every 0.46 μm, imaged from the bottom to the  
550 top of the stack until cells were visible, and reconstructed in Carl Zeiss black edition and  
551 ImageJ. The different biofilm parameters (biomass, maximum thickness, and average  
552 thickness over biomass) were quantified using COMSTAT2 plug-in available for ImageJ  
553 (Heydorn et al., 2000). For depiction of representative reconstructed Z-stacks, the color levels  
554 were adjusted using GNU Image Manipulation Program (GIMP). The colors were adjusted to  
555 the same levels in an experiment across all the different conditions.

556



## 557 ***In vivo* transcriptomic analysis using chinchilla OM model**

558 All chinchilla experiments were conducted with the approval of Allegheny-Singer  
559 Research Institute (ASRI) Institutional Animal Care and Use Committee (IACUC) A3693-  
560 01/1000. Research grade young adult chinchillas (*Chinchilla lanigera*) weighing 400-600g were  
561 acquired from R and R Chinchilla Inc., Ohio. Chinchillas were maintained in BSL2 facilities and  
562 experiments were done under subcutaneously injected ketamine-xylazine anesthesia (1.7mg/kg  
563 animal weight for each). Chinchillas were infected with 100 CFUs in 100 $\mu$ L of *S. pneumoniae*  
564 PN4595-T23 by transbullar inoculation within each middle ear. For RNA extraction, chinchillas  
565 were euthanized 48h post-inoculation of pneumococcus, and a small opening was generated  
566 through the bulla to access the middle ear cavity. Effusions were siphoned out from the middle  
567 ear and flash frozen in liquid nitrogen to preserve the bacterial RNA. Animals were euthanized  
568 by administering an intra-cardiac injection of 1mL potassium chloride after regular sedation.

569

## 570 **Murine colonization model**

571 The role of *briC* in experimental pneumococcal colonization was assessed as previously  
572 described (Al-Bayati et al., 2017; Kahya et al., 2017). For this, 10 weeks old female CD1 mice  
573 (Charles River), weighing approximately 30-35 g were anesthetized with 2.5% isoflurane over  
574 oxygen (1.5 to 2 liter/min), and administered intranasally with approximately  $1 \times 10^5$  CFU/mouse  
575 in 20 $\mu$ l PBS. At predetermined time intervals, a group of 5 mice were euthanized by cervical  
576 dislocation, and the nasopharyngeal lavage of each animal was obtained using 500 $\mu$ l PBS. The  
577 pneumococci in nasopharyngeal wash were enumerated by plating the serial dilutions onto blood  
578 agar plates.

579

## 580 **Statistical Tests**

581 The statistical differences among different groups were calculated by performing ANOVA  
582 followed by Tukey's post-test, unless stated otherwise. p-values of less than 0.05 were  
583 considered to be statistically significant.

584

### 585 **Distribution of *briC* across streptococcal strains**

586 To identify *briC* homologs we used tblastn with default parameters on the RAST  
587 database to search the genome sequences of all fifty-five strains. Predicted protein sequences  
588 were downloaded as well as nucleotide sequences for the *briC* homolog and 1500-bp flanking  
589 regions surrounding the *briC* homolog. Predicted protein sequences for BriC were aligned  
590 using NCBI Cobalt (Papadopoulos and Agarwala, 2007) and visualized using Jalview  
591 (Waterhouse et al., 2009). Jalview was then used to generate a neighbor-joining tree from the  
592 protein multiple sequence alignment, and Principal Component Analysis (PCA) was used to  
593 further analyze variation among the samples. From the PCA results and phylogenetic analysis,  
594 it was determined that three major groups existed within our dataset, with the largest group  
595 having two phenotypes within it. The *briC* alleles were then organized in the context of the  
596 species tree. For this we used a published phylogenetic tree (Cuevas et al., 2017; Kadam et  
597 al., 2017). As previously described, the whole genome sequence (WGS) for these strains were  
598 aligned using MAUVE (Darling et al., 2004, 2010), the core region was extracted and aligned  
599 using MAFFT (FFT-NS-2) (Kato et al., 2002). Model selection was performed using  
600 MODELTEST (Posada and Crandall, 1998), and the phylogenetic tree was built with PhyML  
601 3.0 (Guindon et al., 2010), model GTR+I(0.63) using maximum likelihood and 100 bootstrap  
602 replicates. On the visualization, each allelic type is shape-coded, and the visualization was  
603 generated using the Interactive Tree of Life (iTOL) (Letunic and Bork, 2016).

604

### 605 **Analysis of *briC* promoter region**

606 In order to examine the structure of the promoter region upstream of the *briC* gene, a  
607 1500-bp flanking region on both sides of the *briC* gene was pulled from the RAST database  
608 (Overbeek et al., 2014). Sequences were aligned using Kalign (Lassmann and Sonnhammer,  
609 2005) and then visualized with Jalview (Waterhouse et al., 2009). The alignment revealed two  
610 clear groups within the dataset: those with the promoter insertion and those without. These  
611 promoter insertions were then used to mark the species tree with allelic variants as described  
612 above. We observed this insertion in the representative isolates from two clinically important  
613 lineages PMEN1 and PMEN14. To check the distribution of the longer promoter in a larger set  
614 strains, we used PubMLST (Jolley and Maiden, 2010) to inspect 3,529 sequences with complete  
615 MLST profiles from two large pneumococcal datasets (Chewapreecha et al., 2014; Croucher et  
616 al., 2013). These include thirty-two ST81 (PMEN1), as well as seventy-nine ST236 (PMEN14)  
617 and ten ST320 (PMEN14) strains.

618 For analysis of the ComE-binding box, the ComE consensus sequence was visualized  
619 and extracted from the promoter for the pneumococcal strains. The logo was generated using  
620 WebLogo (Crooks et al., 2004).

621

## 622 **Ethics statement**

623 Mouse experiments were performed at the University of Leicester under appropriate  
624 project (permit no. P7B01C07A) and personal licenses according to the United Kingdom Home  
625 Office guidelines under the Animals Scientific Procedures Act 1986, and the University of  
626 Leicester ethics committee approval. The protocol was agreed by both the U.K. Home Office  
627 and the University of Leicester ethics committee. Where specified, the procedures were carried  
628 out under anesthetic with isoflurane. Animals were housed in individually ventilated cages in a  
629 controlled environment, and were frequently monitored after infection to minimize suffering.  
630 Chinchilla experiments were performed at the Allegheny-Singer Research Institute (ASRI) under

631 the Institutional Animal Care and Use Committee (IACUC) permit A3693-01/1000. Chinchillas  
632 were maintained in BSL2 facilities, and all experiments with chinchillas were done under  
633 subcutaneously injected ketamine-xylazine anesthesia (1.7mg/kg animal weight for each). All  
634 chinchillas were maintained in accordance with the applicable portions of the Animal Welfare  
635 Act, and the guidelines published in the DHHS publication, Guide for the Care and Use of  
636 Laboratory Animals.

637

### 638 **Funding**

639 This work was supported by NIH grant R00-DC-011322 to L.H., Stupakoff Scientific  
640 Achievement Award to S.A., as well as support from the Department of Biological Sciences at  
641 Carnegie Mellon University.

642

### 643 **Acknowledgements**

644 We thank Drs. Alexander Tomasz and Herminia deLancastre for the PMEN1 strain PN4595-T23  
645 and the R6D strain used in this study. We would also like to thank Dr. Donald A. Morrison for  
646 *kan-rpsL* Janus cassette and the plasmid pR412. We thank Anagha Kadam for help on data  
647 analyses, Rolando A. Cuevas for help analyzing biofilm images, and Emilio I. Rodriguez for his  
648 support with experiments.

649

### 650 **Supplementary Tables**

651 **Table S1: Strains used in genomic comparisons and phylogenetic tree.**

652 **Table S2: Strains used in this experimental work.**

653 **Table S3: Primers used in this study.**

654

## 655 References

- 656 Al-Bayati, F. A. Y., Kahya, H. F. H., Damianou, A., Shafeeq, S., Kuipers, O. P., Andrew, P. W.,  
657 et al. (2017). Pneumococcal galactose catabolism is controlled by multiple regulators  
658 acting on pyruvate formate lyase. *Sci. Rep.* 7, 43587. doi:10.1038/srep43587.
- 659 Alloing, G., Martin, B., Granadel, C., and Claverys, J. P. (1998). Development of competence  
660 in *Streptococcus pneumoniae*: pheromone autoinduction and control of quorum sensing  
661 by the oligopeptide permease. *Mol. Microbiol.* 29, 75–83.
- 662 Aprianto, R., Slager, J., Holsappel, S., and Veening, J.-W. (2016). Time-resolved dual RNA-  
663 seq reveals extensive rewiring of lung epithelial and pneumococcal transcriptomes  
664 during early infection. *Genome Biol.* 17, 198. doi:10.1186/s13059-016-1054-5.
- 665 Armbruster, C. E., Hong, W., Pang, B., Weimer, K. E. D., Juneau, R. A., Turner, J., et al.  
666 (2010). Indirect Pathogenicity of *Haemophilus influenzae* and *Moraxella catarrhalis* in  
667 Polymicrobial Otitis Media Occurs via Interspecies Quorum Signaling. *mBio* 1, e00102-  
668 10. doi:10.1128/mBio.00102-10.
- 669 Blanchette-Cain, K., Hinojosa, C. A., Akula Suresh Babu, R., Lizcano, A., Gonzalez-Juarbe,  
670 N., Munoz-Almagro, C., et al. (2013). *Streptococcus pneumoniae* biofilm formation is  
671 strain dependent, multifactorial, and associated with reduced invasiveness and  
672 immunoreactivity during colonization. *mBio* 4, e00745-713. doi:10.1128/mBio.00745-13.
- 673 Bogaert, D., de Groot, R., and Hermans, P. (2004). *Streptococcus pneumoniae* colonisation:  
674 the key to pneumococcal disease. *Lancet Infect. Dis.* 4, 144–154. doi:10.1016/S1473-  
675 3099(04)00938-7.
- 676 Carvalho, S. M., Kloosterman, T. G., Kuipers, O. P., and Neves, A. R. (2011). CcpA Ensures  
677 Optimal Metabolic Fitness of *Streptococcus pneumoniae*. *PLoS ONE* 6, e26707.  
678 doi:10.1371/journal.pone.0026707.
- 679 Chao, Y., Marks, L. R., Pettigrew, M. M., and Hakansson, A. P. (2015). *Streptococcus*  
680 *pneumoniae* biofilm formation and dispersion during colonization and disease. *Front.*  
681 *Cell. Infect. Microbiol.* 4. doi:10.3389/fcimb.2014.00194.
- 682 Chewapreecha, C., Harris, S. R., Croucher, N. J., Turner, C., Marttinen, P., Cheng, L., et al.  
683 (2014). Dense genomic sampling identifies highways of pneumococcal recombination.  
684 *Nat. Genet.* 46, 305–309. doi:10.1038/ng.2895.
- 685 Claverys, J.-P., Prudhomme, M., and Martin, B. (2006). Induction of Competence Regulons as  
686 a General Response to Stress in Gram-Positive Bacteria. *Annu. Rev. Microbiol.* 60,  
687 451–475. doi:10.1146/annurev.micro.60.080805.142139.
- 688 Crooks, G. E., Hon, G., Chandonia, J.-M., and Brenner, S. E. (2004). WebLogo: a sequence  
689 logo generator. *Genome Res.* 14, 1188–1190. doi:10.1101/gr.849004.
- 690 Croucher, N. J., Chewapreecha, C., Hanage, W. P., Harris, S. R., McGee, L., van der Linden,  
691 M., et al. (2014). Evidence for soft selective sweeps in the evolution of pneumococcal  
692 multidrug resistance and vaccine escape. *Genome Biol. Evol.* 6, 1589–1602.  
693 doi:10.1093/gbe/evu120.

- 694 Croucher, N. J., Finkelstein, J. A., Pelton, S. I., Mitchell, P. K., Lee, G. M., Parkhill, J., et al.  
695 (2013). Population genomics of post-vaccine changes in pneumococcal epidemiology.  
696 *Nat. Genet.* 45, 656–663. doi:10.1038/ng.2625.
- 697 Croucher, N. J., Harris, S. R., Fraser, C., Quail, M. A., Burton, J., van der Linden, M., et al.  
698 (2011). Rapid pneumococcal evolution in response to clinical interventions. *Science*  
699 331, 430–434. doi:10.1126/science.1198545.
- 700 Cuevas, R. A., Eutsey, R., Kadam, A., West-Roberts, J. A., Woolford, C. A., Mitchell, A. P., et  
701 al. (2017). A novel streptococcal cell-cell communication peptide promotes  
702 pneumococcal virulence and biofilm formation. *Mol. Microbiol.* 105, 554–571.  
703 doi:10.1111/mmi.13721.
- 704 Darling, A. C. E., Mau, B., Blattner, F. R., and Perna, N. T. (2004). Mauve: Multiple Alignment  
705 of Conserved Genomic Sequence With Rearrangements. *Genome Res.* 14, 1394–1403.  
706 doi:10.1101/gr.2289704.
- 707 Darling, A. E., Mau, B., and Perna, N. T. (2010). progressiveMauve: Multiple Genome  
708 Alignment with Gene Gain, Loss and Rearrangement. *PLoS ONE* 5, e11147.  
709 doi:10.1371/journal.pone.0011147.
- 710 Dawid, S., Roche, A. M., and Weiser, J. N. (2007). The blp bacteriocins of *Streptococcus*  
711 *pneumoniae* mediate intraspecies competition both in vitro and in vivo. *Infect. Immun.*  
712 75, 443–451. doi:10.1128/IAI.01775-05.
- 713 Gagne, A. L., Stevens, K. E., Cassone, M., Pujari, A., Abiola, O. E., Chang, D. J., et al. (2013).  
714 Competence in *Streptococcus pneumoniae* Is a Response to an Increasing Mutational  
715 Burden. *PLOS ONE* 8, e72613. doi:10.1371/journal.pone.0072613.
- 716 Geiss, G. K., Bumgarner, R. E., Birditt, B., Dahl, T., Dowidar, N., Dunaway, D. L., et al. (2008).  
717 Direct multiplexed measurement of gene expression with color-coded probe pairs. *Nat.*  
718 *Biotechnol.* 26, 317–325. doi:10.1038/nbt1385.
- 719 Guenzi, E., Gasc, A.-M., Sicard, M. A., and Hakenbeck, R. (1994). A two-component signal-  
720 transducing system is involved in competence and penicillin susceptibility in laboratory  
721 mutants of *Streptococcus pneumoniae*. *Mol. Microbiol.* 12, 505–515.  
722 doi:10.1111/j.1365-2958.1994.tb01038.x.
- 723 Guindon, S., Dufayard, J.-F., Lefort, V., Anisimova, M., Hordijk, W., and Gascuel, O. (2010).  
724 New Algorithms and Methods to Estimate Maximum-Likelihood Phylogenies: Assessing  
725 the Performance of PhyML 3.0. *Syst. Biol.* 59, 307–321. doi:10.1093/sysbio/syq010.
- 726 Hakenbeck, R., and Chhatwal, S. (2007). *Molecular Biology of Streptococci*. Horizon Scientific  
727 Press.
- 728 Hall-Stoodley, L., Costerton, J. W., and Stoodley, P. (2004). Bacterial biofilms: from the Natural  
729 environment to infectious diseases. *Nat. Rev. Microbiol.* 2, 95–108.  
730 doi:10.1038/nrmicro821.



- 731 Hall-Stoodley, L., Hu, F. Z., Gieseke, A., Nistico, L., Nguyen, D., Hayes, J., et al. (2006). Direct  
732 Detection of Bacterial Biofilms on the Middle-Ear Mucosa of Children With Chronic Otitis  
733 Media. *JAMA J. Am. Med. Assoc.* 296, 202–211. doi:10.1001/jama.296.2.202.
- 734 Havarstein, L. S., Coomaraswamy, G., and Morrison, D. A. (1995a). An unmodified  
735 heptadecapeptide pheromone induces competence for genetic transformation in  
736 *Streptococcus pneumoniae*. *Proc. Natl. Acad. Sci. U. S. A.* 92, 11140–11144.
- 737 Havarstein, L. S., Coomaraswamy, G., and Morrison, D. A. (1995b). An unmodified  
738 heptadecapeptide pheromone induces competence for genetic transformation in  
739 *Streptococcus pneumoniae*. *Proc. Natl. Acad. Sci. U. S. A.* 92, 11140–11144.
- 740 Håvarstein, L. S., Gaustad, P., Nes, I. F., and Morrison, D. A. (1996). Identification of the  
741 streptococcal competence-pheromone receptor. *Mol. Microbiol.* 21, 863–869.  
742 doi:10.1046/j.1365-2958.1996.521416.x.
- 743 Heydorn, A., Nielsen, A. T., Hentzer, M., Sternberg, C., Givskov, M., Ersbøll, B. K., et al.  
744 (2000). Quantification of biofilm structures by the novel computer program COMSTAT.  
745 *Microbiol. Read. Engl.* 146 ( Pt 10), 2395–2407.
- 746 Hiller, N. L., Eutsey, R. A., Powell, E., Earl, J. P., Janto, B., Martin, D. P., et al. (2011).  
747 Differences in Genotype and Virulence among Four Multidrug-Resistant *Streptococcus*  
748 *pneumoniae* Isolates Belonging to the PMEN1 Clone. *PLoS ONE* 6, e28850.  
749 doi:10.1371/journal.pone.0028850.
- 750 Hoa, M., Syamal, M., Sachdeva, L., Berk, R., and Coticchia, J. (2009). Demonstration of  
751 nasopharyngeal and middle ear mucosal biofilms in an animal model of acute otitis  
752 media. *Ann. Otol. Rhinol. Laryngol.* 118, 292–298.
- 753 Jolley, K. A., and Maiden, M. C. (2010). BIGSdb: Scalable analysis of bacterial genome  
754 variation at the population level. *BMC Bioinformatics* 11, 595. doi:10.1186/1471-2105-  
755 11-595.
- 756 Kadam, A., Eutsey, R. A., Rosch, J., Miao, X., Longwell, M., Xu, W., et al. (2017). Promiscuous  
757 signaling by a regulatory system unique to the pandemic PMEN1 pneumococcal  
758 lineage. *PLOS Pathog.* 13, e1006339. doi:10.1371/journal.ppat.1006339.
- 759 Kahya, H. F., Andrew, P. W., and Yesilkaya, H. (2017). Deacetylation of sialic acid by  
760 esterases potentiates pneumococcal neuraminidase activity for mucin utilization,  
761 colonization and virulence. *PLOS Pathog.* 13, e1006263.  
762 doi:10.1371/journal.ppat.1006263.
- 763 Katoh, K., Misawa, K., Kuma, K., and Miyata, T. (2002). MAFFT: a novel method for rapid  
764 multiple sequence alignment based on fast Fourier transform. *Nucleic Acids Res.* 30,  
765 3059–3066.
- 766 Kim, W., Park, H. K., Hwang, W.-J., and Shin, H.-S. (2013). Simultaneous Detection of  
767 *Streptococcus pneumoniae*, *S. mitis*, and *S. oralis* by a Novel Multiplex PCR Assay  
768 Targeting the *gyrB* Gene. *J. Clin. Microbiol.* 51, 835–840. doi:10.1128/JCM.02920-12.



- 769 Kjos, M., Miller, E., Slager, J., Lake, F. B., Gericke, O., Roberts, I. S., et al. (2016). Expression  
770 of *Streptococcus pneumoniae* Bacteriocins Is Induced by Antibiotics via Regulatory  
771 Interplay with the Competence System. *PLOS Pathog.* 12, e1005422.  
772 doi:10.1371/journal.ppat.1005422.
- 773 Lanie, J. A., Ng, W.-L., Kazmierczak, K. M., Andrzejewski, T. M., Davidsen, T. M., Wayne, K.  
774 J., et al. (2007). Genome sequence of Avery's virulent serotype 2 strain D39 of  
775 *Streptococcus pneumoniae* and comparison with that of unencapsulated laboratory  
776 strain R6. *J. Bacteriol.* 189, 38–51. doi:10.1128/JB.01148-06.
- 777 Lassmann, T., and Sonnhammer, E. L. (2005). Kalign – an accurate and fast multiple  
778 sequence alignment algorithm. *BMC Bioinformatics* 6, 298. doi:10.1186/1471-2105-6-  
779 298.
- 780 Letunic, I., and Bork, P. (2016). Interactive tree of life (iTOL) v3: an online tool for the display  
781 and annotation of phylogenetic and other trees. *Nucleic Acids Res.* 44, W242-245.  
782 doi:10.1093/nar/gkw290.
- 783 Marks, L. R., Davidson, B. A., Knight, P. R., and Hakansson, A. P. (2013). Interkingdom  
784 signaling induces *Streptococcus pneumoniae* biofilm dispersion and transition from  
785 asymptomatic colonization to disease. *mBio* 4. doi:10.1128/mBio.00438-13.
- 786 Marks, L. R., Parameswaran, G. I., and Hakansson, A. P. (2012a). Pneumococcal interactions  
787 with epithelial cells are crucial for optimal biofilm formation and colonization in vitro and  
788 in vivo. *Infect. Immun.* 80, 2744–2760. doi:10.1128/IAI.00488-12.
- 789 Marks, L. R., Reddinger, R. M., and Hakansson, A. P. (2012b). High Levels of Genetic  
790 Recombination during Nasopharyngeal Carriage and Biofilm Formation in  
791 *Streptococcus pneumoniae*. *mBio* 3, e00200-12. doi:10.1128/mBio.00200-12.
- 792 Martin, B., Granadel, C., Campo, N., Hénard, V., Prudhomme, M., and Claverys, J.-P. (2010).  
793 Expression and maintenance of ComD-ComE, the two-component signal-transduction  
794 system that controls competence of *Streptococcus pneumoniae*. *Mol. Microbiol.* 75,  
795 1513–1528. doi:10.1111/j.1365-2958.2010.07071.x.
- 796 Mascher, T., Zähner, D., Merai, M., Balmelle, N., de Saizieu, A. B., and Hakenbeck, R. (2003).  
797 The *Streptococcus pneumoniae* *cia* regulon: *CiaR* target sites and transcription profile  
798 analysis. *J. Bacteriol.* 185, 60–70.
- 799 Miller, JH (1972). "Assay of b-galactosidase.," in *Experiments in Molecular Genetics*. Cold  
800 Spring Harbor, New York: Laboratory Press, 352–355.
- 801 Moreno-Gómez, S., Sorg, R. A., Domenech, A., Kjos, M., Weissing, F. J., Doorn, G. S., et al.  
802 (2017). Quorum sensing integrates environmental cues, cell density and cell history to  
803 control bacterial competence. *Nat. Commun.* 8, 854. doi:10.1038/s41467-017-00903-y.
- 804 Oggioni, M. R., Trappetti, C., Kadioglu, A., Cassone, M., Iannelli, F., Ricci, S., et al. (2006).  
805 Switch from planktonic to sessile life: a major event in pneumococcal pathogenesis.  
806 *Mol. Microbiol.* 61, 1196–1210. doi:10.1111/j.1365-2958.2006.05310.x.

- 807 Overbeek, R., Olson, R., Pusch, G. D., Olsen, G. J., Davis, J. J., Disz, T., et al. (2014). The  
808 SEED and the Rapid Annotation of microbial genomes using Subsystems Technology  
809 (RAST). *Nucleic Acids Res.* 42, D206–D214. doi:10.1093/nar/gkt1226.
- 810 Paixão, L., Oliveira, J., Veríssimo, A., Vinga, S., Lourenço, E. C., Ventura, M. R., et al. (2015).  
811 Host glycan sugar-specific pathways in *Streptococcus pneumoniae*: galactose as a key  
812 sugar in colonisation and infection. *PLoS One* 10, e0121042.  
813 doi:10.1371/journal.pone.0121042.
- 814 Papadopoulos, J. S., and Agarwala, R. (2007). COBALT: constraint-based alignment tool for  
815 multiple protein sequences. *Bioinformatics* 23, 1073–1079.  
816 doi:10.1093/bioinformatics/btm076.
- 817 Pestova, E. V., Håvarstein, L. S., and Morrison, D. A. (1996). Regulation of competence for  
818 genetic transformation in *Streptococcus pneumoniae* by an auto-induced peptide  
819 pheromone and a two-component regulatory system. *Mol. Microbiol.* 21, 853–862.
- 820 Peterson, S. N., Sung, C. K., Cline, R., Desai, B. V., Snedrud, E. C., Luo, P., et al. (2004).  
821 Identification of competence pheromone responsive genes in *Streptococcus*  
822 *pneumoniae* by use of DNA microarrays. *Mol. Microbiol.* 51, 1051–1070.
- 823 Posada, D., and Crandall, K. A. (1998). MODELTEST: testing the model of DNA substitution.  
824 *Bioinforma. Oxf. Engl.* 14, 817–818.
- 825 Ramakers, C., Ruijter, J. M., Deprez, R. H. L., and Moorman, A. F. M. (2003). Assumption-free  
826 analysis of quantitative real-time polymerase chain reaction (PCR) data. *Neurosci. Lett.*  
827 339, 62–66.
- 828 Ruijter, J. M., Lorenz, P., Tuomi, J. M., Hecker, M., and van den Hoff, M. J. B. (2014).  
829 Fluorescent-increase kinetics of different fluorescent reporters used for qPCR depend  
830 on monitoring chemistry, targeted sequence, type of DNA input and PCR efficiency.  
831 *Mikrochim. Acta* 181, 1689–1696. doi:10.1007/s00604-013-1155-8.
- 832 Sanderson, A. R., Leid, J. G., and Hunsaker, D. (2006). Bacterial biofilms on the sinus mucosa  
833 of human subjects with chronic rhinosinusitis. *The Laryngoscope* 116, 1121–1126.  
834 doi:10.1097/01.mlg.0000221954.05467.54.
- 835 Sebert, M. E., Patel, K. P., Plotnick, M., and Weiser, J. N. (2005). Pneumococcal HtrA  
836 protease mediates inhibition of competence by the CiaRH two-component signaling  
837 system. *J. Bacteriol.* 187, 3969–3979. doi:10.1128/JB.187.12.3969-3979.2005.
- 838 Severin, A., Figueiredo, A. M., and Tomasz, A. (1996). Separation of abnormal cell wall  
839 composition from penicillin resistance through genetic transformation of *Streptococcus*  
840 *pneumoniae*. *J. Bacteriol.* 178, 1788–1792.
- 841 Shanker, E., and Federle, M. J. (2017). Quorum Sensing Regulation of Competence and  
842 Bacteriocins in *Streptococcus pneumoniae* and mutans. *Genes* 8.  
843 doi:10.3390/genes8010015.
- 844 Son, M. R., Shchepetov, M., Adrian, P. V., Madhi, S. A., de Gouveia, L., von Gottberg, A., et  
845 al. (2011). Conserved mutations in the pneumococcal bacteriocin transporter gene,

- 846            blpA, result in a complex population consisting of producers and cheaters. *mBio* 2.  
847            doi:10.1128/mBio.00179-11.
- 848 Tomasz, A. (1965). Control of the Competent State in Pneumococcus by a Hormone-Like Cell  
849            Product: An Example for a New Type of Regulatory Mechanism in Bacteria. *Nature* 208,  
850            155–159. doi:10.1038/208155a0.
- 851 Trappetti, C., Gualdi, L., Meola, L. D., Jain, P., Korir, C. C., Edmonds, P., et al. (2011a). The  
852            impact of the competence quorum sensing system on *Streptococcus pneumoniae*  
853            biofilms varies depending on the experimental model. *BMC Microbiol.* 11, 75.  
854            doi:10.1186/1471-2180-11-75.
- 855 Trappetti, C., Potter, A. J., Paton, A. W., Oggioni, M. R., and Paton, J. C. (2011b). LuxS  
856            Mediates Iron-Dependent Biofilm Formation, Competence, and Fratricide in  
857            *Streptococcus pneumoniae*  $\vartriangle$ . *Infect. Immun.* 79, 4550–4558. doi:10.1128/IAI.05644-11.
- 858 Vidal, J. E., Howery, K. E., Ludewick, H. P., Nava, P., and Klugman, K. P. (2013). Quorum-  
859            sensing systems LuxS/autoinducer 2 and Com regulate *Streptococcus pneumoniae*  
860            biofilms in a bioreactor with living cultures of human respiratory cells. *Infect. Immun.* 81,  
861            1341–1353. doi:10.1128/IAI.01096-12.
- 862 Vidal, J. E., Ludewick, H. P., Kunkel, R. M., Zähler, D., and Klugman, K. P. (2011). The LuxS-  
863            Dependent Quorum-Sensing System Regulates Early Biofilm Formation by  
864            *Streptococcus pneumoniae* Strain D39  $\vartriangle$ . *Infect. Immun.* 79, 4050–4060.  
865            doi:10.1128/IAI.05186-11.
- 866 Waterhouse, A. M., Procter, J. B., Martin, D. M. A., Clamp, M., and Barton, G. J. (2009).  
867            Jalview Version 2—a multiple sequence alignment editor and analysis workbench.  
868            *Bioinformatics* 25, 1189–1191. doi:10.1093/bioinformatics/btp033.
- 869 Ween, O., Gaustad, P., and Håvarstein, L. S. (1999). Identification of DNA binding sites for  
870            ComE, a key regulator of natural competence in *Streptococcus pneumoniae*. *Mol.*  
871            *Microbiol.* 33, 817–827.
- 872 Wholey, W.-Y., Kochan, T. J., Storck, D. N., and Dawid, S. (2016). Coordinated Bacteriocin  
873            Expression and Competence in *Streptococcus pneumoniae* Contributes to Genetic  
874            Adaptation through Neighbor Predation. *PLOS Pathog.* 12, e1005413.  
875            doi:10.1371/journal.ppat.1005413.
- 876 Wyres, K. L., Lambertsen, L. M., Croucher, N. J., McGee, L., von Gottberg, A., Liñares, J., et  
877            al. (2012). The multidrug-resistant PMEN1 pneumococcus is a paradigm for genetic  
878            success. *Genome Biol.* 13, R103. doi:10.1186/gb-2012-13-11-r103.
- 879 Zähler, D., and Hakenbeck, R. (2000). The *Streptococcus pneumoniae* Beta-Galactosidase Is  
880            a Surface Protein. *J. Bacteriol.* 182, 5919–5921.

881

882

## Figure 1

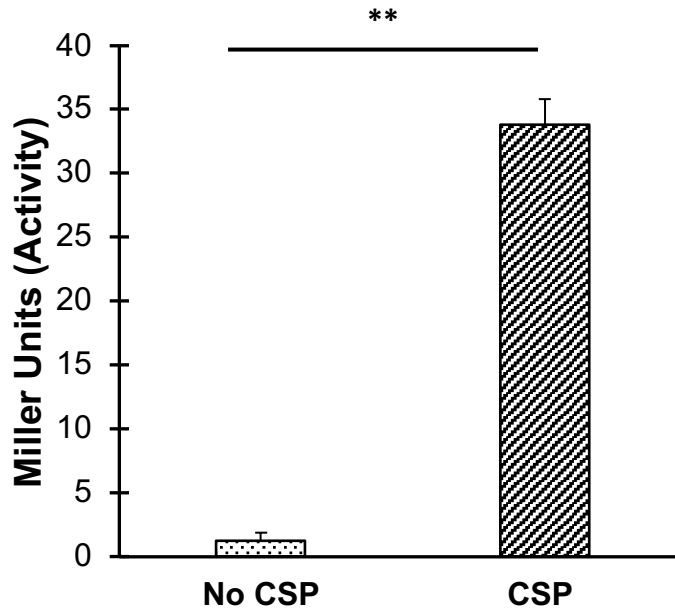

**Fig. 1. Expression of *briC* is induced by CSP.**  $\beta$ -galactosidase assay measuring *PbriC-lacZ* activity in pneumococcal R6 cells grown to exponential phase in Columbia Broth at pH 6.6 followed by treatment with CSP1 for 30 minutes or untreated. Y-axis denotes *PbriC-lacZ* expression levels in Miller Units. Activity is expressed in nmol p-nitrophenol/min/ml. Error bars represent standard error of the mean for biological replicates ( $n=3$ ); \*\*  $p<0.01$  using Student's two-tailed paired  $t$ -test.

## Figure 2

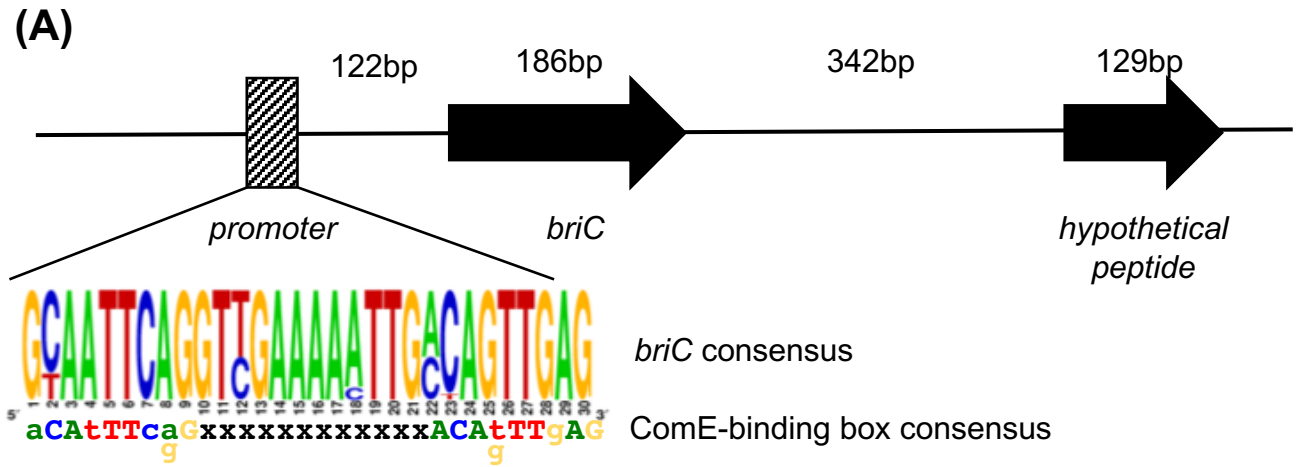

## Figure 2

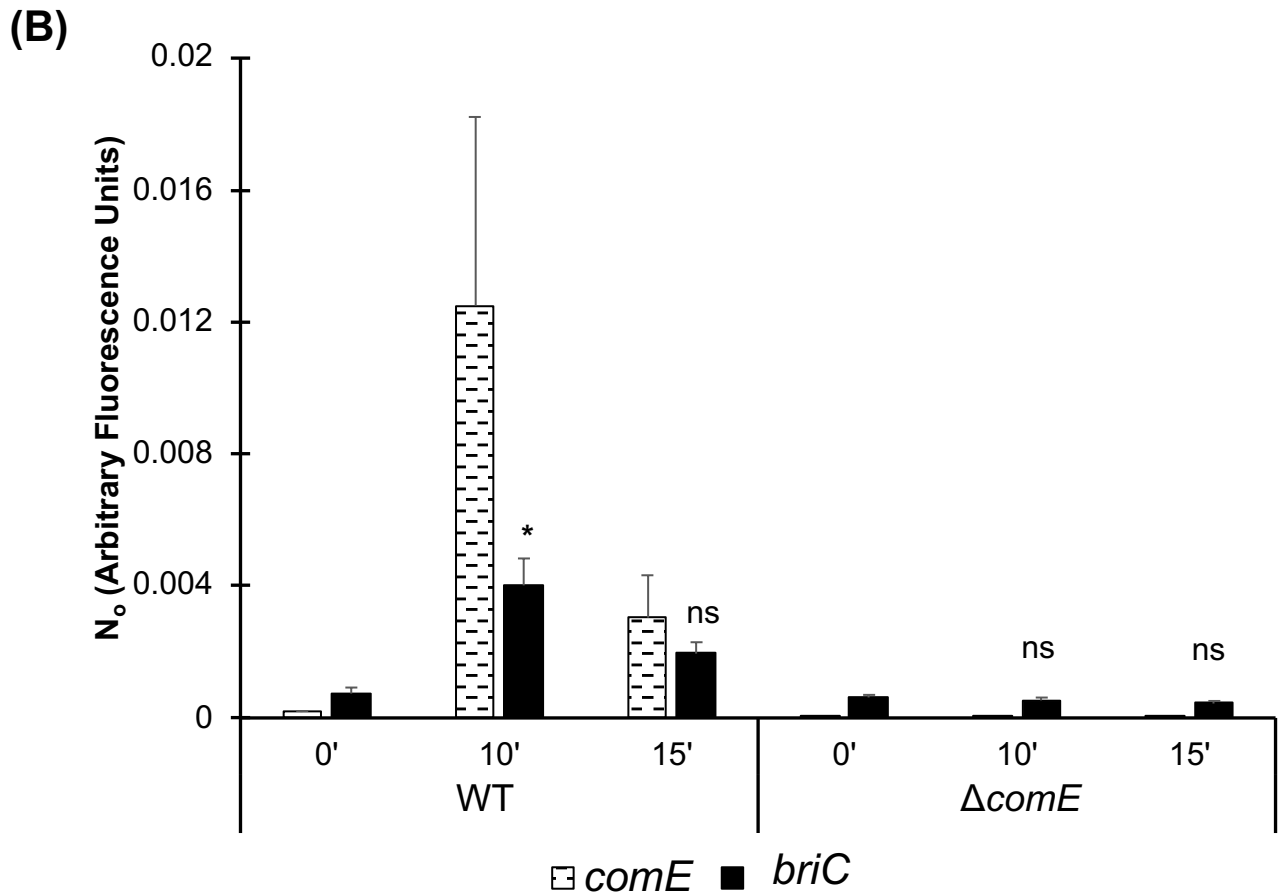

**Fig. 2. CSP-induction of *briC* is ComE-dependent.** (A) Genomic organization of the *briC* locus in strain R6D. Black arrows: coding sequences; box with diagonal lines: ComE binding-box within the putative *briC* promoter region; expanded region: logo generated from the predicted *briC* ComE-binding box in thirty-four pneumococcal genomes aligned with the published ComE-binding box consensus sequence. (B) mRNA transcript levels of *briC* (solid black) and *comE* (dashed black lines) as measured by qRT-PCR in R6D WT & R6D $\Delta comE$  cells. Cells were grown in Columbia broth at pH 6.6 to an  $OD_{600}$  of 0.3, and then treated with CSP1 for either 0', 10' or 15'. Data was normalized to 16S rRNA levels. Y-axis denotes normalized concentrations of mRNA levels in arbitrary fluorescence units as calculated from LinRegPCR. Error bars represent standard error of the mean calculated for biological replicates ( $n=3$ ); 'ns' denotes non-significant, \*  $p<0.05$  using ANOVA followed by Tukey's post-test relative to the respective 0' CSP treatment. Further, *briC* levels are also significantly higher in WT relative to  $\Delta comE$  cells for the same time points post-CSP treatment ( $p<0.05$ ).

## Figure 3

(A)

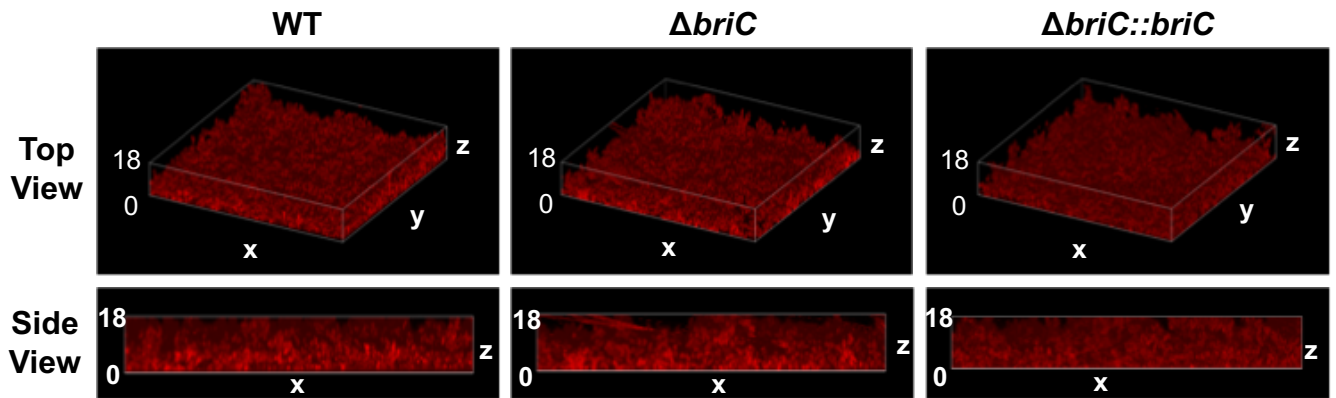

(B)

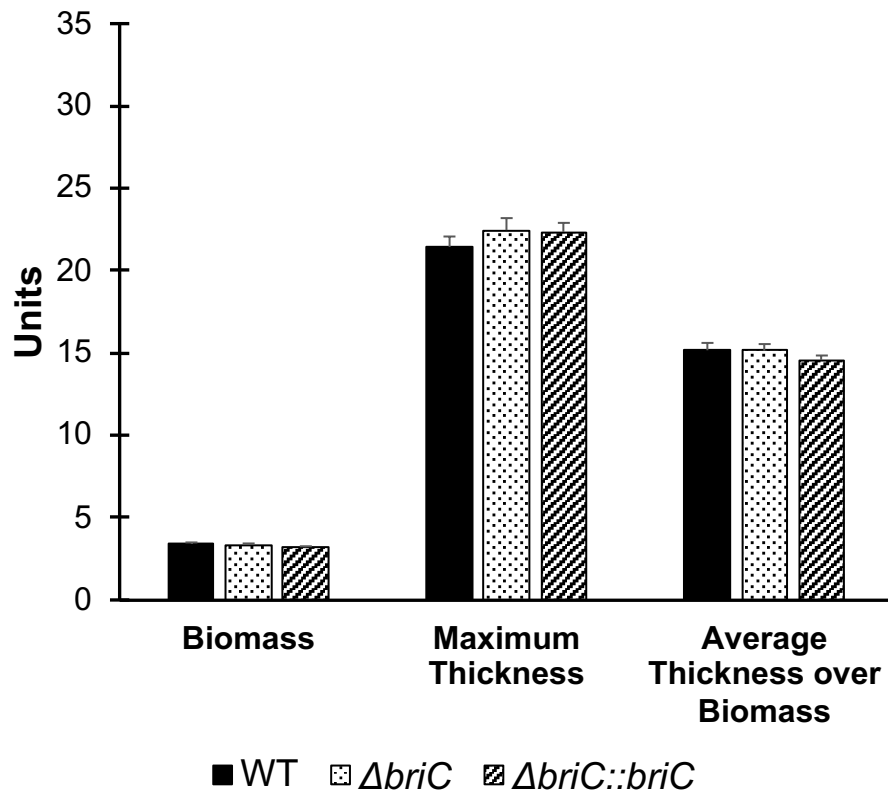



## Figure 3

(C)

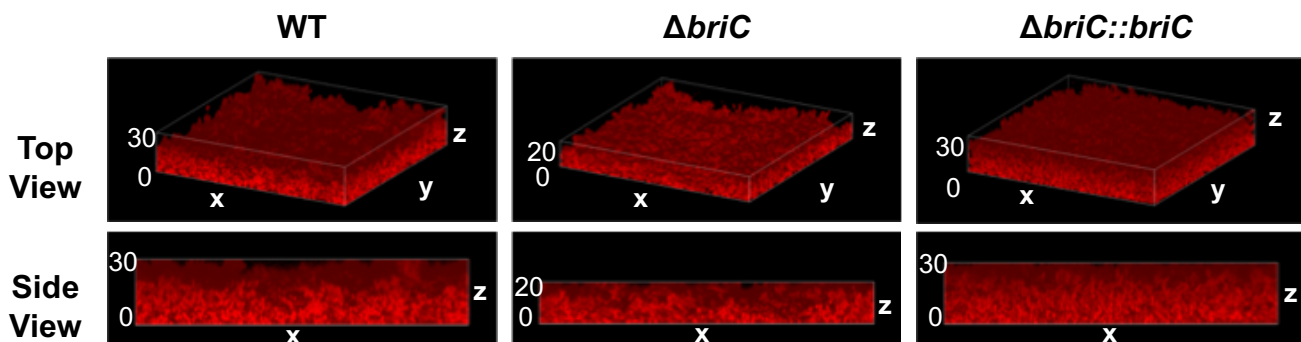

(D)

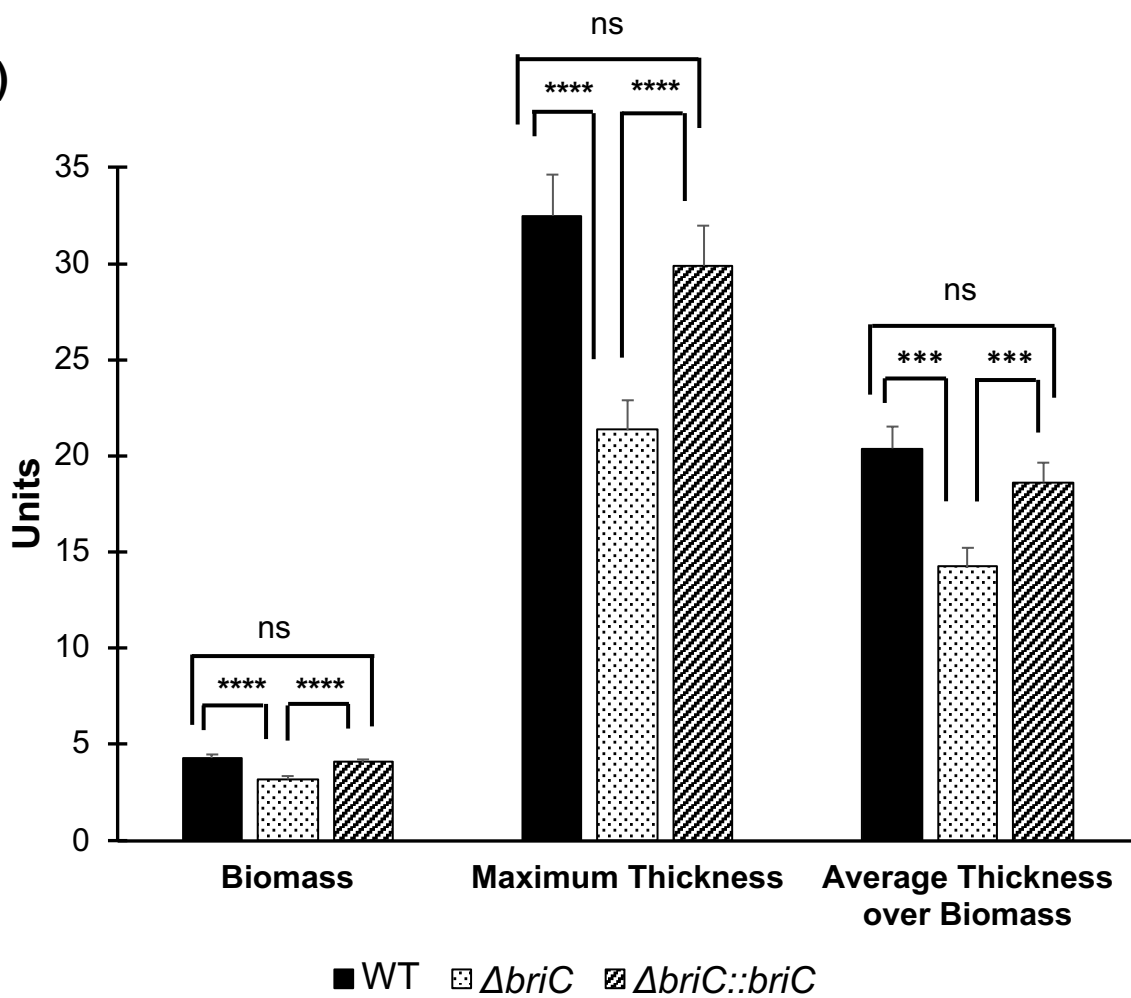

**Fig. 3. BriC stimulates late biofilm development.** Representative confocal microscopy images showing top & side views of the reconstructed biofilm stacks of WT,  $\Delta briC$  and  $\Delta briC::briC$  cells of strain R6D stained with SYTO59 dye at **(A)** 24-hr, and **(C)** 72-hr. 'x', 'y' and 'z' represent different axes of the reconstructed Z-stack with the numbers representing thickness in  $\mu\text{m}$ . COMSTAT2 quantification of **(B)** 24-hr, and **(D)** 72-hr biofilm images. Y-axis denotes units of measurement:  $\mu\text{m}^3/\mu\text{m}^2$  for biomass, and  $\mu\text{m}$  for maximum thickness and average thickness over biomass. Error bars represent standard error of the mean calculated for biological replicates ( $n=3$ ); "ns" denotes non-significant comparisons, \*\*\*  $p<0.001$ , and \*\*\*\*  $p<0.0001$  using ANOVA followed by Tukey's post-test.

# Figure 4

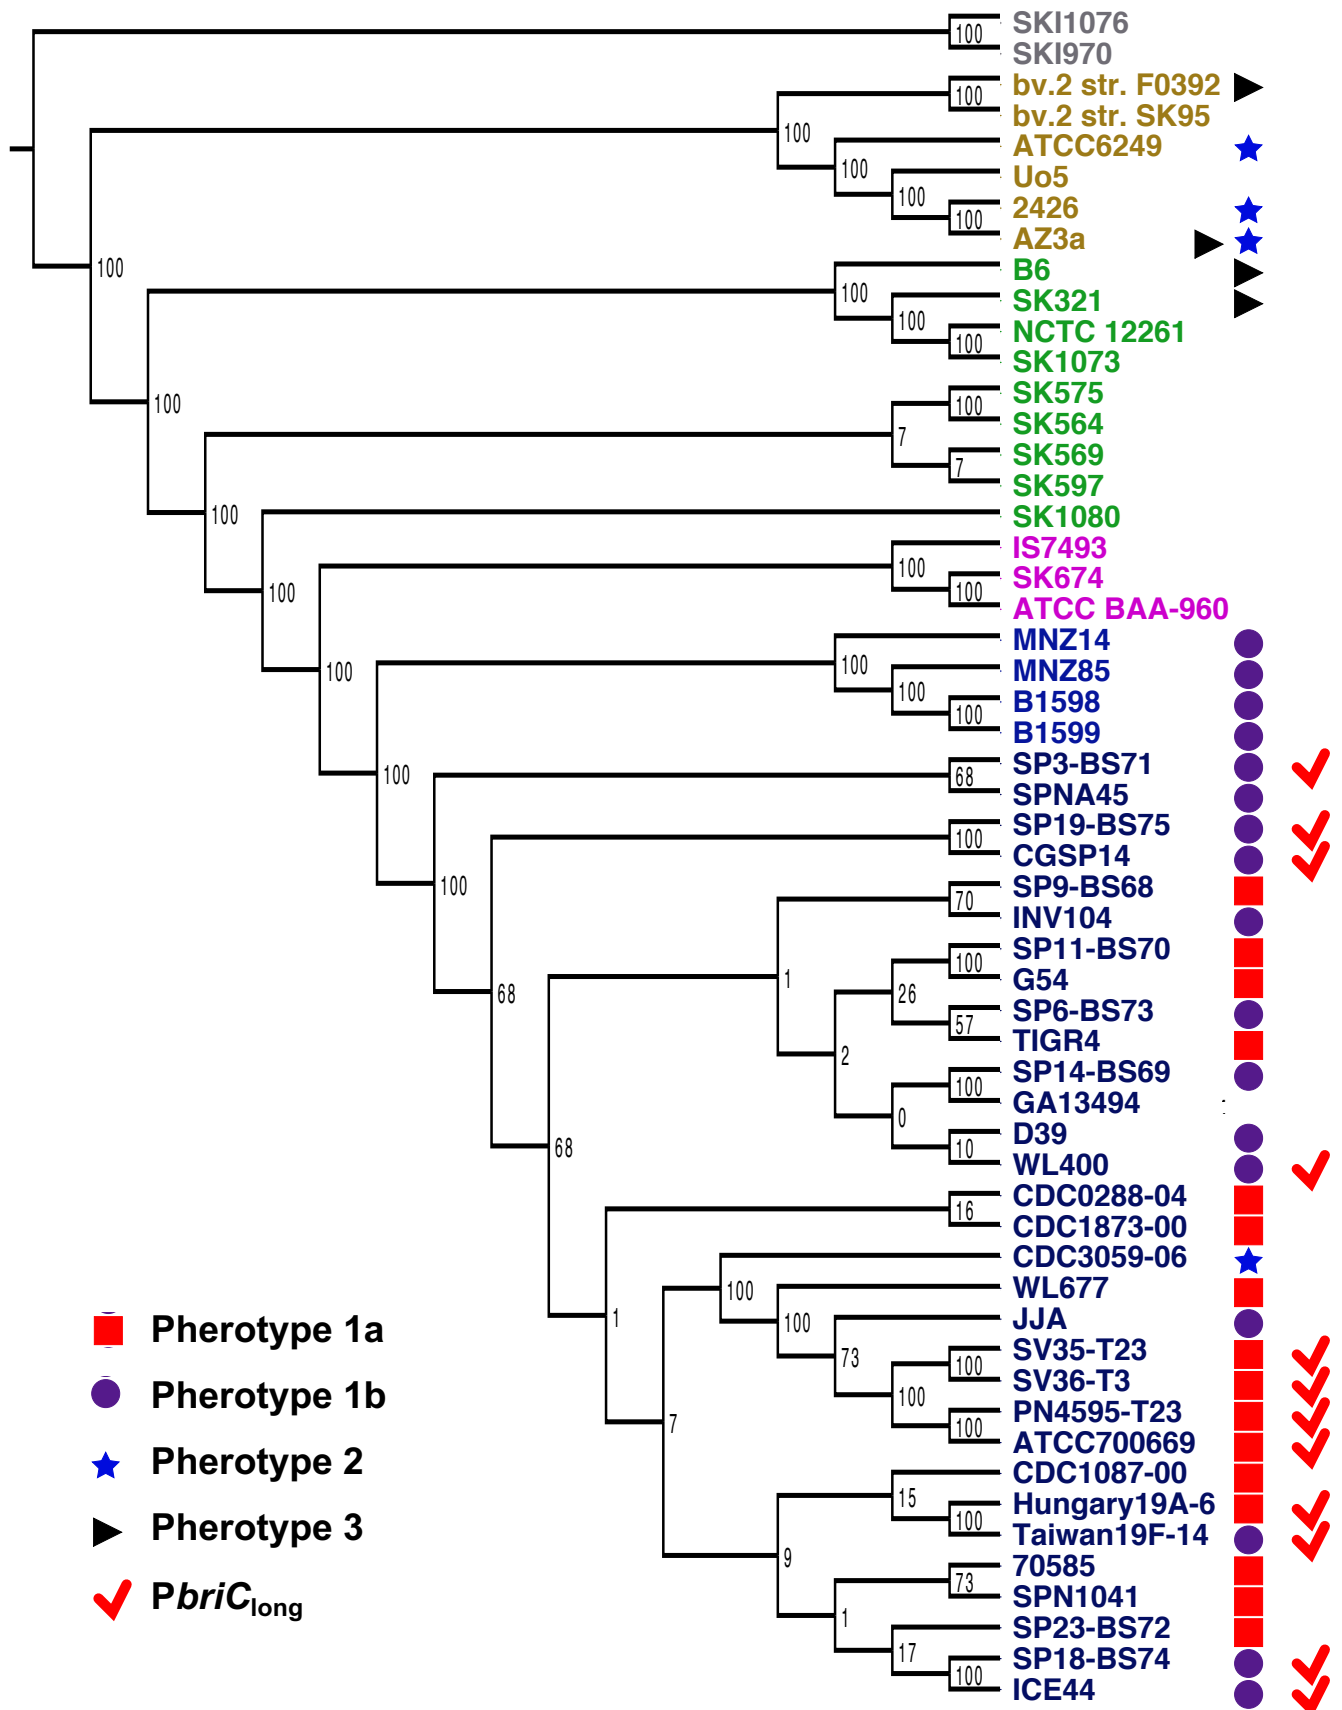

**Fig. 4. Distribution of the genomic region encoding BriC across streptococcal strains.** Distribution of *briC* alleles in fifty-five streptococcal genomes. The *briC* alleles are visualized against a maximum likelihood tree of streptococcal genomes generated from the core genome, where the numbers on the branches represent bootstrap values. Species are color-coded as follows: *S. pneumoniae* (blue), *S. pseudopneumoniae* (pink), *S. mitis* (green), *S. oralis* (beige), and *S. infantis* (grey). The shapes at the tip of the branches illustrate *briC* alleles: 1a (red square), 1b (purple circle), 2 (blue star), and 3 (black triangle). Types “1a” and “1b” represent variants of the alleles widespread across pneumococcal strains; type “3” denotes a group with high variability. The BriC coding sequences are aligned in Figure S2. The red tick marks genomes which have a longer promoter, which in PMEN1 strains leads to increase in basal levels of *briC* in a CSP-independent manner.

## Figure 5

A

*S. pneumoniae* R6

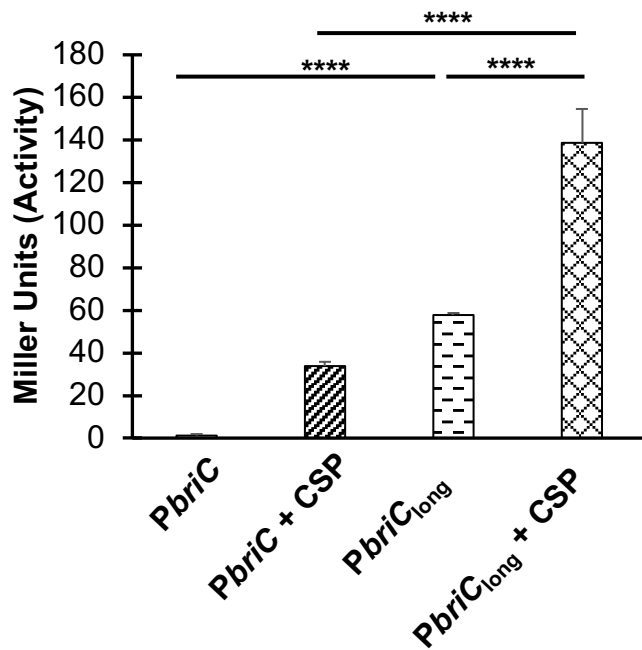

B

*S. pneumoniae* PN4595-T23

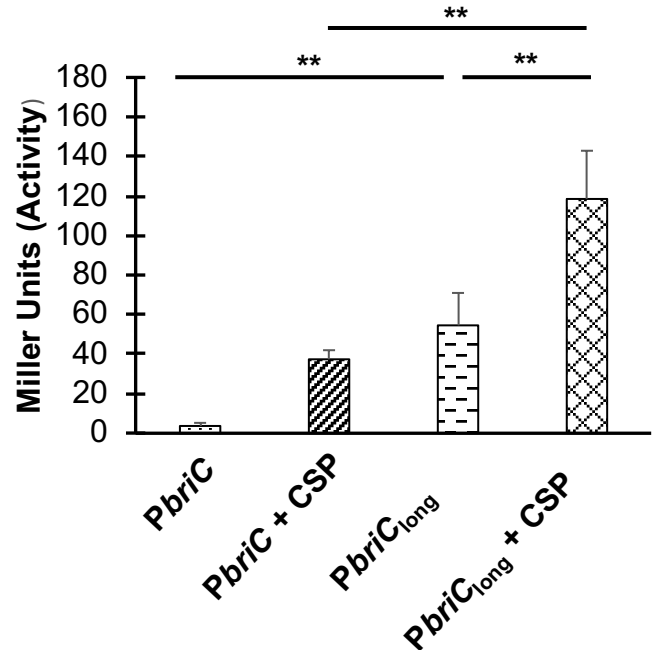

**Fig. 5. Longer *briC* promoter is associated with an increase in the basal levels of *briC*.**  $\beta$ -galactosidase assay comparing the LacZ activity of the R6 (short promoter, *PbrIC-lacZ*) and PN4595-T23 (longer promoter, *PbrIC<sub>long</sub>-lacZ*) promoters. Both promoter activities were tested in **(A)** strain R6 and **(B)** strain PN4595-T23. Cells were grown in Columbia broth at pH 6.6 until mid-log phase, followed by either no treatment or treatment with CSP for 30 minutes. Y-axis denotes promoter activity in Miller Units expressed in nmol p-nitrophenol/min/ml. Error bars represent standard error of the mean for biological replicates ( $n=3$ ); \*\*  $p<0.01$ , & \*\*\*\*  $p<0.0001$  using ANOVA followed by Tukey's post-test.

## Figure 6

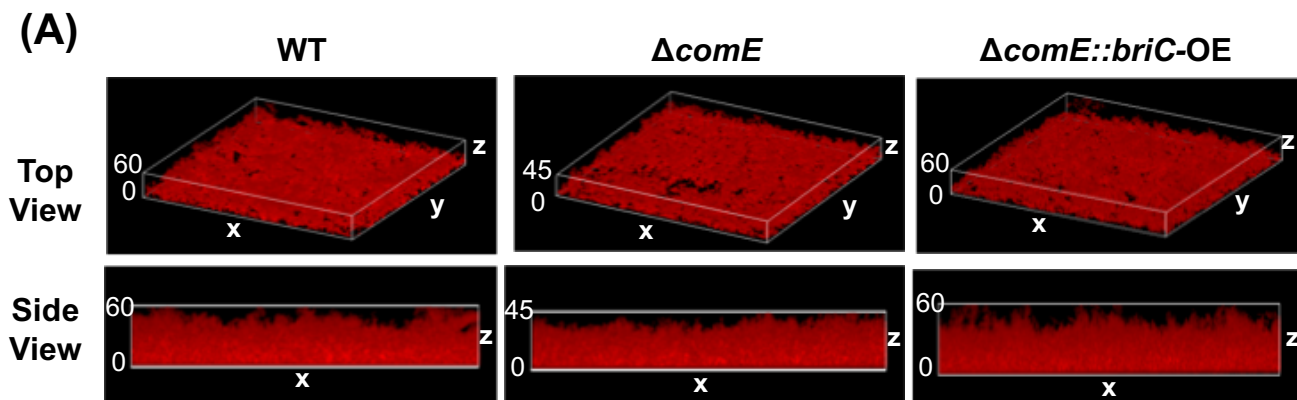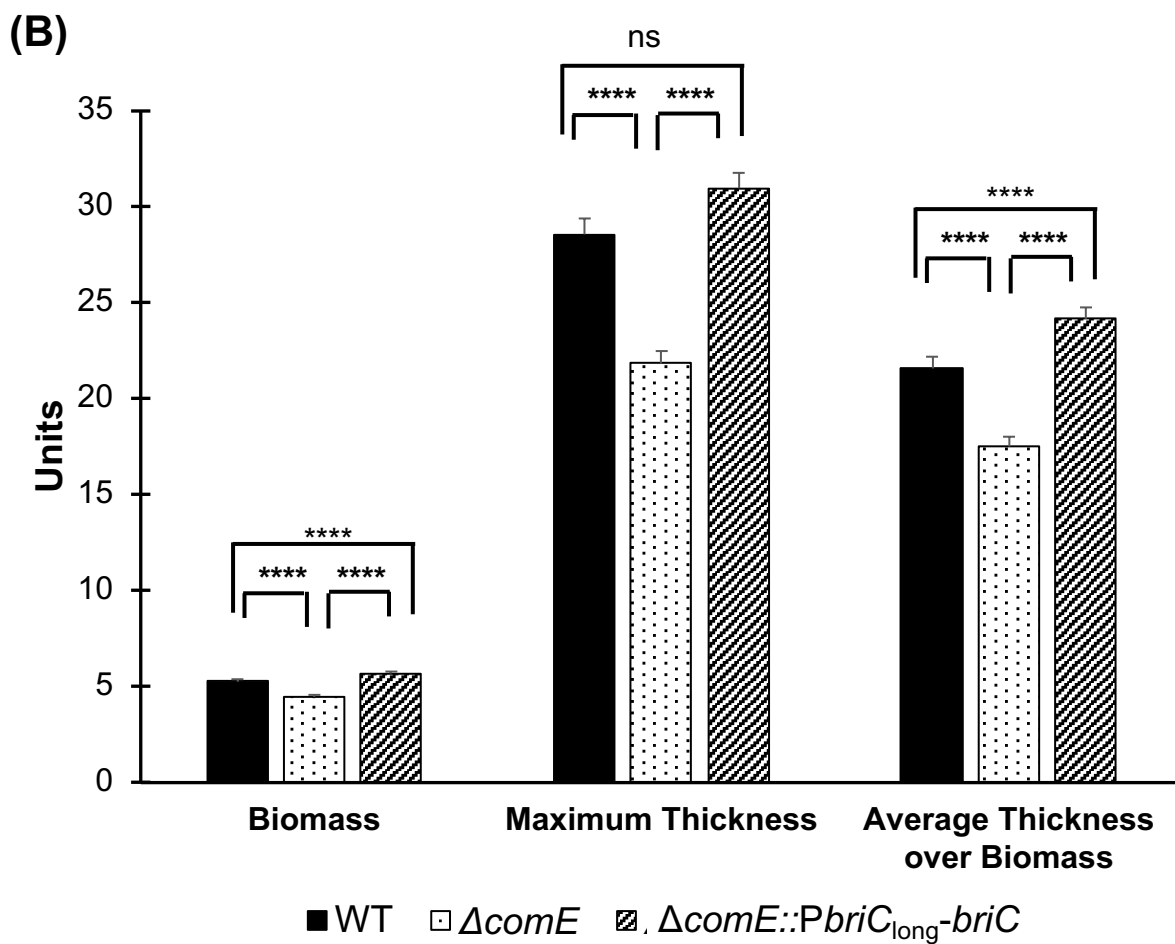

**Fig. 6. BriC plays a pivotal role in regulating biofilm development. (A)** Representative confocal microscopy images showing top & side views of the reconstructed biofilm stacks of WT,  $\Delta comE$  and  $\Delta comE::PbriC_{long}-briC$  cells of strain R6D stained with SYTO59 dye at 72-hr. 'x', 'y' and 'z' represent different axes of the reconstructed Z-stack with the numbers representing thickness in  $\mu m$ . **(B)** COMSTAT2 quantification of 72-hr biofilm images. Y-axis denotes units of measurement:  $\mu m^3/\mu m^2$  for biomass, and  $\mu m$  for maximum thickness and average thickness over biomass. Error bars represent standard error of the mean calculated for biological replicates ( $n=6$ ); "ns" denotes non-significant comparisons, and \*\*\*\*  $p<0.0001$  using ANOVA followed by Tukey's post-test.



## Figure 7

(A)

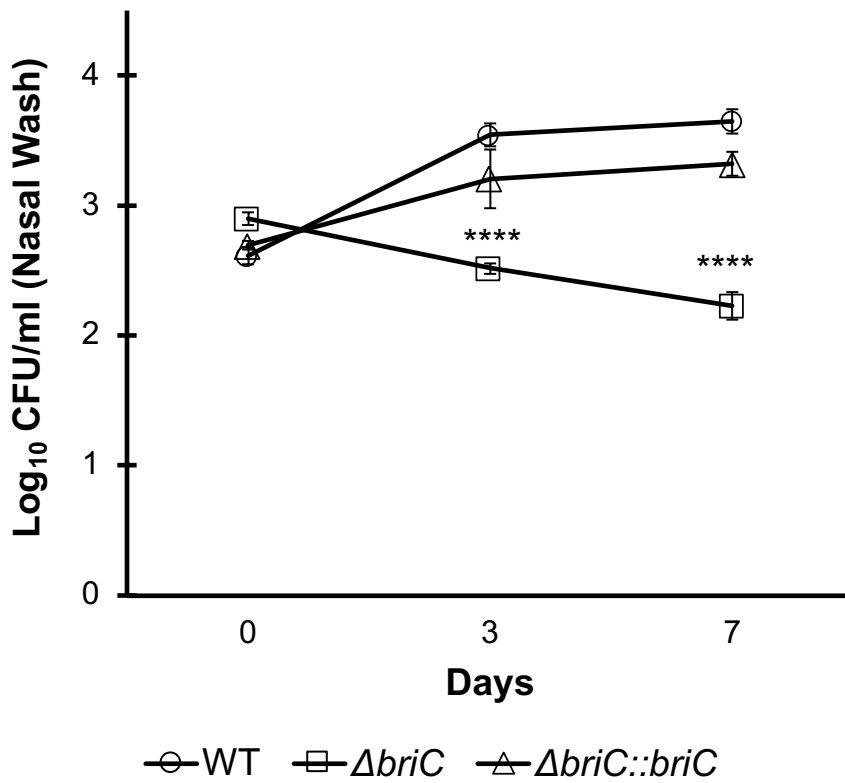

(B)

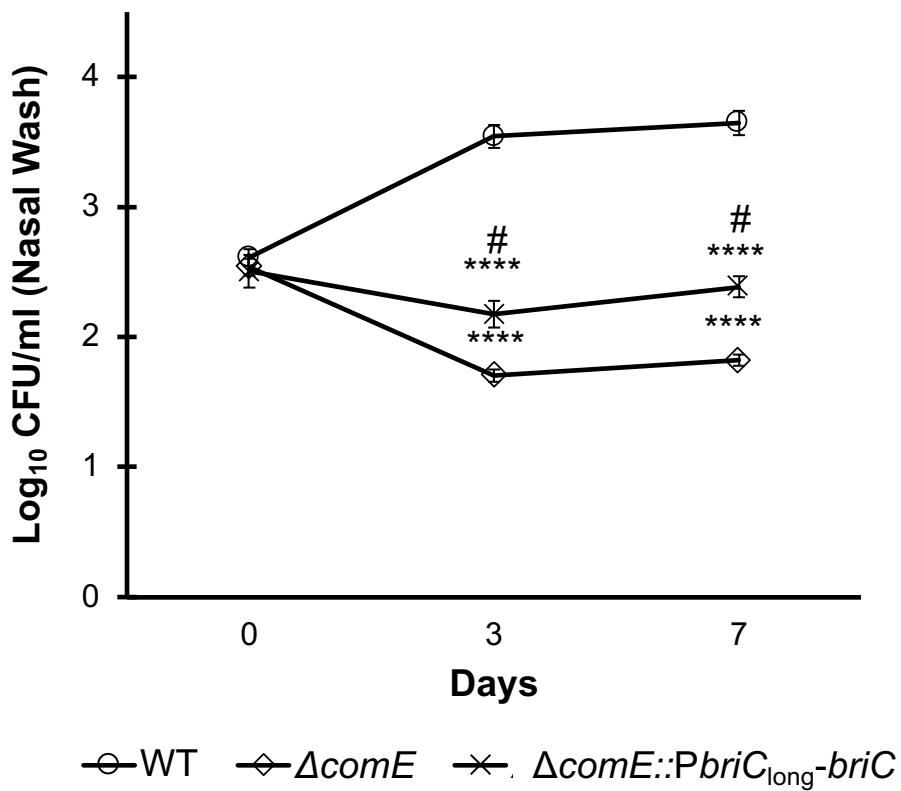

**Fig. 7. BriC contributes to pneumococcal colonization of the mouse nasopharynx.** CD1 mice were infected intranasally with 20 $\mu$ l PBS containing approximately  $1 \times 10^5$  CFU of (A) WT,  $\Delta briC$ , and  $\Delta briC::briC$  (B) WT,  $\Delta comE$ , and  $\Delta comE::PbriC_{long}-briC$  cells of the pneumococcal strain D39. At predetermined time points (0, 3 & 7 days post-infection), at least five mice were culled, and the pneumococcal counts in the nasopharyngeal washes were enumerated by plating on blood agar. Y-axis represents  $\text{Log}_{10}$  counts of CFU recovered from nasal washes. X-axis represents days post-inoculation. Each data point represents the mean of data from at least five mice. Error bars show the standard error of the mean. \*\*\*\*  $p < 0.0001$  relative to the WT strain, and #  $p < 0.0001$  relative to the  $\Delta comE$  strain, calculated using ANOVA and Tukey post-test.
